1 **Actomyosin-II facilitates long-range retrograde transport of large cargoes by**  
2 **controlling axonal radial contractility**

3 Tong Wang<sup>1,3,\*</sup>, Wei Li<sup>1</sup>, Sally Martin<sup>1,2</sup>, Andreas Papadopoulos<sup>1</sup>, Golnoosh  
4 Shamsollahi<sup>1</sup>, Vanessa Lanoue<sup>1</sup>, Pranesh Padmanabhan<sup>1</sup>, He Huang<sup>1</sup>, Xiaojun Yu<sup>1</sup>,  
5 Victor Anggono<sup>1,3</sup> and Frederic A. Meunier<sup>1,3,\*</sup>

6 **Affiliations:**

7 <sup>1</sup>Clem Jones Centre for Ageing Dementia Research, Queensland Brain Institute, The  
8 University of Queensland, Brisbane, QLD 4072, Australia.

9 <sup>2</sup>Current address: The Australian Institute for Bioengineering and Nanotechnology,  
10 The University of Queensland, Brisbane, QLD 4072, Australia.

11 <sup>3</sup>Senior author.

12 \*Correspondence to: Tong Wang ([t.wang4@uq.edu.au](mailto:t.wang4@uq.edu.au)), or Frederic A. Meunier  
13 ([f.meunier@uq.edu.au](mailto:f.meunier@uq.edu.au)), Clem Jones Centre for Ageing Dementia Research,  
14 Queensland Brain Institute, The University of Queensland, Brisbane, Queensland  
15 4072, Australia.

16

17 **Abstract**

18 Most mammalian neurons have a narrow axon, which constrains the passage of large  
19 cargoes such as autophagosome as they can be larger than the axon diameter.  
20 Variations in tension must therefore occur radially to facilitate changes in axonal  
21 diameter and ensure efficient axoplasmic trafficking. Here, we reveal that the transit  
22 of diverse large membrane-bound cargoes causes an acute, albeit transient, radial  
23 expansion of the axonal diameter, which is immediately restored by constricting  
24 forces. We demonstrate that non-muscle myosin II (NM-II) forms ~200 nm periodic  
25 structures, which associate with axonal F-actin rings. Inhibition of NM-II activity  
26 with blebbistatin significantly increases axon diameter without affecting the  
27 periodicity of either the F-actin rings or NM-II. This sustained radial expansion  
28 significantly affects the trafficking speed, directionality, and reduces the overall  
29 efficiency of long-range retrograde axonal cargoes, eventually leading to focal axon  
30 swelling and cargo accumulation, which are hallmarks of axonal degeneration.

31

32 **Introduction**

33 Neurons are polarized cells that contain many nerve terminal boutons separated from  
34 the cell body by a long and thin axon. Within the axon, an active bidirectional cargo  
35 transport system mediates the trafficking of proteins, lipids, membrane-bound vesicles  
36 and organelles (cargoes) that undergo retrograde or anterograde transport. Tightly  
37 regulated axonal transport is pivotal for neuronal development, communication and  
38 survival<sup>1, 2</sup>. Despite the heavy trafficking, quantitative electron microscopy studies  
39 have found that thin axons (inner diameter < 1  $\mu\text{m}$ ) are the most abundant type in the  
40 mammalian central nervous system (CNS)<sup>3, 4</sup>. For instance, the long-range connective  
41 axons found in the human corpus callosum have an average diameter that ranges

42 between 0.64  $\mu\text{m}$  and 0.74  $\mu\text{m}^3$ . In contrast, the size of axonal cargoes is highly  
43 variable, encompassing autophagosomes (0.5-1.5  $\mu\text{m}$ )<sup>5</sup>, mitochondria (0.75-3  $\mu\text{m}$ )<sup>6</sup>  
44 and endosomes (50 nm-1  $\mu\text{m}$ )<sup>7</sup>. Thus, the range of cargo sizes is comparable to, or  
45 surprisingly even larger than some of the CNS axons themselves. This advocates for  
46 the existence of radial contractility in the axons, which would allow the transient  
47 expansion of axon calibre and facilitate the passage of large cargoes. Indeed, the  
48 expansion of axonal diameter surrounding large cargoes, *i.e.* autophagosomes<sup>8</sup> or  
49 mitochondria<sup>9</sup>, has been observed by super-resolution microscopy and 2D-electron  
50 microscopy (EM) in both normal and degenerating axons<sup>10, 11</sup>. Considering the spatial  
51 limitation exerted by the rigid axon membrane<sup>12</sup>, the trafficking of large cargoes is  
52 likely to be affected. In fact, a simulation study based on axon structure and intra-  
53 axonal microfluidic dynamics predicted that cargo trafficking was impeded by the  
54 friction from the axonal walls in small-calibre axons<sup>13</sup>. In line with this prediction, a  
55 correlation between axon diameter and axon trafficking was recently reported in  
56 *Drosophila*<sup>14, 15</sup> and rodent neurons<sup>16, 17</sup>. However, direct evidence showing whether  
57 and how axonal radial contractility affects cargo trafficking is still lacking.

58

59 We hypothesized that the underlying structural basis for axonal radial contractility is  
60 the subcortical actomyosin network, which is organized into specialized structures  
61 called membrane-associated periodic cytoskeletal structures (MPS), as revealed with  
62 super-resolution microscopy along the shafts of mature axons<sup>18</sup>. F-actin, together with  
63 adducin and spectrin, forms a subcortical lattice with a ~190 nm periodic interval  
64 covering the majority of the axon length<sup>18, 19</sup>. The disrupting of axonal F-actin leads to  
65 loss of MPS<sup>20, 21</sup>, whereas the depletion of adducin causes progressive dilation of the  
66 axon diameter and axon loss, with slightly impaired axonal trafficking<sup>16</sup>. The fact that

67 adducin knock-out axons are still capable of decreasing the diameter of actin rings  
68 over time suggests the existence of additional actin regulatory machineries that  
69 maintain this constriction. Indeed, the dynamic contractility of the subcortical  
70 actomyosin network depends on non-muscle myosin-II (NM-II)<sup>22</sup>, which generates  
71 the subcellular forces required to restore the shape of the cell following acute  
72 stretching<sup>23</sup>. In line with this function, the activated regulatory light chain (pMLC) of  
73 NM-II has recently been shown to exist in periodic patterns in close association with  
74 the MPS in the axon initiation segment (AIS) of mammalian CNS neurons<sup>24</sup>, with  
75 actomyosin-dependent contractility being implicated in maintaining axon diameter by  
76 coupling the radial and axial axonal contractility in *Drosophila*<sup>14</sup>. Understanding how  
77 the dynamic cytoskeletal architecture coordinates the radial axonal contractility and  
78 cargo trafficking is therefore warranted.

79

80 In this study, we used super-resolution live-imaging approaches to examine the  
81 correlation between the speed of axonal cargoes undergoing long-range transport and  
82 their size. We found that the speed inversely correlates with the cargo size, and that  
83 the axon undergoes dynamic local deformation during the passage of large cargoes,  
84 which induces transient enlargement immediately followed by constriction of the  
85 axon diameter. We further demonstrated, using super-resolution structured  
86 illumination microscopy (SR-SIM) as well as simulated emission depletion (STED)  
87 microscopy, that this transient change in axon diameter is mediated by NM-II, which  
88 forms an approximately 200 nm periodical structure perpendicular to the longitudinal  
89 axis of axons. Our results suggest that CNS axons are under constitutive radial  
90 constriction, which limits their diameter. Accordingly, short-term inhibition of axonal  
91 NM-II activity with blebbistatin, a specific membrane-permeable inhibitor that

92 stabilizes myosin-II in an actin-detached state<sup>25</sup>, does not affect the periodicity of  
93 either F-actin or NM-II itself, but rather effectively decreases their colocalization and  
94 expands the diameter of the axon. As a result of augmented axon diameter, short-term  
95 blebbistatin incubation affects the transport speed of large cargoes by increasing both  
96 the speed of fast-moving cargoes and the back-and-forth movements of stalled ones.  
97 This leads to an increase in cargo mobility at the expense of overall trafficking  
98 efficacy. Prolonged NM-II inactivation by either blebbistatin treatment or transfection  
99 of a myosin-II regulatory light chain (MRLC) loss-of-function mutant eventually  
100 leads to the formation of focal axon swellings (FAS) and the accumulation of  
101 retrograde cargoes along the axons. In conclusion, our study reveals the critical role of  
102 axonal NM-II which, by associating with subcortical MPS in the axon shaft, provides  
103 subcellular radial constriction that minimizes the axonal swelling and undirected  
104 cargo movements. It therefore ensures the structural stability as well as the cargo-  
105 trafficking efficiency along the small-calibre axons.

106

## 107 **Results**

### 108 *The speed of retrograde axonal cargoes is inversely correlated with their size.*

109 Large axonal cargoes such as endosomes, lysosomes, autophagosomes and  
110 mitochondria tend to accumulate in FAS under pathological conditions<sup>26</sup>, suggesting  
111 that the size of cargoes might alter the axonal trafficking efficacy. To determine the  
112 relationship between the size of cargoes and their transport speed, we analyzed the  
113 speeds of various-sized retrograde lysosomal and endosomal vesicles. These cargoes  
114 were generated and fluorescent-labelled with the lysosomal marker LysoTracker or the  
115 endosomal marker Cholera toxin subunit B (CTB) at the nerve terminals, and  
116 underwent retrograde trafficking along the axon bundles of live hippocampal neurons

117 cultured in microfluidic devices (Fig. 1a, b). Hydrostatic pressure was used to restrict  
118 the labelling reagents to the terminal chamber during the 5 min pulse-labelling (Fig.  
119 1c). This was followed by a thorough wash in culture medium to remove the excess  
120 fluorescent probe and confocal time-lapse imaging and automatic tracing of the  
121 fluorescently tagged cargoes as previously described<sup>8, 27, 28</sup>. To investigate different  
122 stages of axonal trafficking, live-imaging was performed in two distinct axonal  
123 regions: (1) the axon shafts adjacent to the soma chamber (Fig. 1d, left) and (2) within  
124 the terminal chamber (Fig. 1d, right). LysoTracker-labelled vesicles detected in the  
125 nerve terminal chamber exhibited very confined movements (sFig. 1a and sMov. 1).  
126 We further quantified the average speed of these tracks, which were sorted into two  
127 different groups according to their diameter (sFig. 1a, bottom panels). We observed  
128 that vesicles with a large diameter ('large', diameter > 0.5  $\mu\text{m}$ ) moved significantly  
129 slower ( $0.115 \pm 0.039 \mu\text{m/s}$ ) than those with a smaller diameter ('small', diameter  $\leq$   
130  $0.5 \mu\text{m}$ ;  $0.159 \pm 0.006 \mu\text{m/s}$ ), as shown in sFig. 1b. This suggests that transport of  
131 large axonal cargoes in axons surrounding nerve terminals could be impeded during  
132 their transit. To specifically investigate the correlation between the size of axonal  
133 cargoes and their active transport speed, we further examined the trafficking speed of  
134 long-range CTB-positive retrograde carriers in the soma-proximal axon channels (Fig.  
135 1e-g). Consistent with our previous study<sup>29</sup>, these long-range carriers exhibited a  
136 much faster trafficking speed ( $0.974$ - $1.659 \mu\text{m/s}$ ) than the carriers at nerve terminals  
137 ( $0.115$ - $0.159 \mu\text{m/s}$ ; Fig. 1g; sFig. 1b). Similar to the lysosomes in the nerve terminals,  
138 the trafficking speed of these CTB-positive carriers also inversely correlated with  
139 their diameter, with small-diameter cargoes moving faster ( $1.657 \pm 0.06 \mu\text{m/s}$ ) than  
140 large-diameter ones ( $0.974 \pm 0.05 \mu\text{m/s}$ ; Fig. 1g; sMov. 2). We then examined the

141 correlation between cargo size and speed by plotting the apparent diameter of either  
142 lysosomal carriers or CTB-positive carriers against their speed. This revealed a  
143 negative correlation, with a Pearson's coefficient of  $-0.303 \pm 0.095$  and  $-0.273 \pm$   
144  $0.036$  between cargo diameter and trafficking speed in the terminal ("Lysotracker",  
145 Fig. 1h) and proximal ("CTB", Fig. 1h) axons, respectively, indicating that the speed  
146 of the trafficked cargoes declines as the cargo size increases.

147

148 ***Transit of large cargoes causes a significant radial expansion of the axon.***

149 Each organelle undergoing retrograde axonal transport is driven by multiple dyneins,  
150 which are stochastically activated and collectively drive cargo transport through the  
151 axonal cytosol<sup>30-32</sup>. Given the low viscosity of axonal cytosol, the force generated by  
152 cooperative dyneins is sufficient to ensure their retrograde trafficking through the  
153 axon<sup>32</sup>. Thus, the reduced speed of the larger cargoes we observed is unlikely due to  
154 insufficient driving force or a higher viscous load due to the larger size. Considering  
155 the recent evidence suggesting the role of axon diameter in axon cargo trafficking<sup>14-16</sup>,  
156 we hypothesized that the size-dependent friction on the axonal cargoes comes from  
157 the constrictive force exerted by the axonal plasma membrane, which is more likely to  
158 impede the transport of larger retrograde cargoes.

159 To test this hypothesis, we examined the diameter of axons in the presence or absence  
160 of cargoes at the ultrastructural level. In order to eliminate confounding factors related  
161 to the analysis of dendrites, experiments were only performed on axonal bundles  
162 formed within the channels of microfluidic devices<sup>8, 27, 28</sup>, as shown in Fig. 2a. We  
163 first used EM to visualize the morphology of both axon shafts and their internal  
164 cargoes. As demonstrated in Fig. 2b-c, on the parallel axonal bundles, the diameters  
165 of axons were indeed significantly increased around large cargoes, such as large

166 endosomes (Fig. 2c, i, arrow), mitochondria (Fig. 2c, ii and iii, white arrowheads) and  
167 autophagosomes (Fig. 2c, iii and iv, black arrowheads). When we measured the  
168 diameter of the axonal segment with (red) and without cargo (blue) in the same axon,  
169 we found that those with cargoes had a significantly larger diameter ( $347 \pm 15.6$  nm)  
170 than those without cargoes ( $259 \pm 9.4$  nm; Fig. 2d) with paired comparison. We also  
171 observed that, as the size of the cargoes increased, the extent of axon expansion also  
172 increased proportionally (Fig. 2e, f), suggesting that the stretch of the axon membrane  
173 is indeed caused by the transiting cargo.

174

175 We next investigated the effect of transiting cargoes on the diameter of axons in live  
176 hippocampal neurons. To effectively label the subcortical actomyosin network in  
177 axons, we used Lifeact-GFP, a peptide that binds to both actin filaments (F-actin) and  
178 cytosolic actin monomers<sup>33</sup>. Similar to a previous study<sup>34</sup>, with the resolution of SIM,  
179 we detected Lifeact-GFP distribution in both the filamentous and cytosolic fractions  
180 in axons of live hippocampal neurons (Fig. 3a), with the plasma membrane labelled  
181 by CTB-Alexa555. Interestingly, the improved 3D-SIM resolution allowed us to  
182 observe various-sized intra-axonal fluorescence voids (“black-holes”) that likely  
183 represent axoplasmic organelles (Fig. 3b), which are known to exclude actin from  
184 their lumens<sup>35</sup>. Similar to the cargo-induced axon dilation observed with EM, the axon  
185 diameter was also significantly expanded in axon segments with black-holes (Fig. 3c).  
186 We then characterized the nature of these black-holes by comparing their localization  
187 with that of various organelle markers resolved by 3D-SIM, and found substantial  
188 overlap with autophagosomes (LC3-mRFP, Fig. 3d), late endosomes (Rab7-mRFP,  
189 Fig. 3e) and mitochondria (Mito-TagRFP, Fig. 3f). This suggests that these black-  
190 holes were indeed created by large organelles, which caused significant local dilation



191 of the axon (Fig. 3g). To further investigate whether these black-holes were cargoes  
192 that associate with the transport machinery, we determined their colocalization with  
193 markers of retrograde carriers, such as terminal-derived CTB<sup>27</sup> and the neuron-  
194 specific dynein intermediate chain 1B (DIC<sup>1B</sup>)<sup>36</sup>. The black-holes partially overlapped  
195 with CTB- and DIC<sup>1B</sup>-positive axonal structures (Fig. 3h, i), indicating that a  
196 substantial portion of them were indeed caused by retrograde trafficking organelles in  
197 live axons.

198

199 Next, we investigated whether the transit of cargoes correlated with the local axon  
200 dilation in live axons. Using time-lapse SIM and unbiased Gaussian fitting (Fig. 4a),  
201 we assessed the fluctuations in axon diameter and clearly detected radial diameter  
202 expansion through the transient separation of the two lateral axonal membranes,  
203 which caused an increase in the distance between the centre of the Gaussians (Fig. 4b;  
204 sMov. 3). This effect was transient and the initial diameter was restored after the  
205 passage of the organelles (black-holes), as shown in Fig. 4c. In addition, the  
206 association between diameter expansion and the passage of lysotracker- and CTB-  
207 positive carriers was also observed by phase-contrast confocal microscopy (Fig. 4d-e).  
208 Taken together, our results demonstrate that radial dilation of the axon diameter is  
209 caused by the passage of cargoes in the axons of live hippocampal neurons.

210

211 ***NM-II forms periodic structures that associate with F-actin MPS and controls the***  
212 ***radial contractility of axon.***

213 The contractility and plasma membrane tension of cells is controlled by NM-II. To  
214 investigate whether NM-II is involved in the cargo-associated radial dilation of axons,  
215 we treated Lifeact-GFP-expressing neurons with blebbistatin, and examined the

216 cargo-associated diameter fluctuations of their axons. We observed that blebbistatin  
217 treatment (10  $\mu$ M, 60 min) caused a significant relaxation of the axon shaft by  
218 increasing axon diameter with ( $\phi_{+cargo}$ ) and without ( $\phi_{-cargo}$ ) cargoes (Fig. 5a, b). We  
219 then explored the diameter fluctuations by comparing the average ratio of axon  
220 diameter containing cargoes to that without cargoes, and used this ratio ( $\phi_{+cargo}/\phi_{-cargo}$ )  
221 as an index of the cargo-associated diameter fluctuations. Blebbistatin treatment  
222 significantly decreased this index, resulting in more uniformly dilated axons (Fig. 5c).  
223 These results suggest that radial contractility of the axon shaft is dependent on the  
224 NM-II activity of the actomyosin network.

225

226 To further explore the molecular basis of the axonal radial contractility, we sought to  
227 resolve the actomyosin structure along the axon shafts. As F-actin and its associated  
228 proteins are known to form MPS in axons<sup>18, 19, 21</sup>, we first aimed to characterize the  
229 actin MPS along the axon shaft using SIM, which had previously been used to  
230 accurately visualize axon MPS<sup>37</sup>. In cultured hippocampal neurons, phalloidin  
231 staining of F-actin allowed the observation of MPS formed along the axon shaft with  
232 a conserved longitudinal spacing of  $\sim$ 190 nm (Fig. 5d; sFig. 2a), as quantified using  
233 the frequency distribution of spacing between adjacent actin peaks detected using  
234 phalloidin-647 ( $191.8 \pm 2.3$  nm; Fig. 5e-f; sFig. 2b) or Lifeact-GFP (sFig. 2c-g), and  
235 confirmed by auto-correlation analysis ( $184.6 \pm 4.1$  nm; Fig. 5g). Obtained values  
236 were similar to those previously reported in rat hippocampal axons<sup>18, 21</sup>. As NM-II is  
237 involved in the regulation of axonal diameter<sup>14</sup> and associated with the MPS in  
238 axons<sup>24</sup>, we also examined whether blocking NM-II activity affected the spacing of  
239 actin MPS. 60 min of blebbistatin treatment had no effect on this spacing (Fig. 5e, f).  
240 However, this short-term treatment significantly increased the radial diameters of the

241 actin rings in treated axons (Fig. 5d, h), causing a more uniformly dilated actin MPS,  
242 as reflected by the decreased ring diameter fluctuation (Fig. 5i). These results are  
243 consistent with the effect of blebbistatin on axonal diameter expansion in live axons.  
244 The significant dilation of actin MPS caused by detaching NM-II suggests that the  
245 interaction between NM-II and actin MPS underlies the radial contractility of axons.  
246  
247 To examine this hypothesis and assess the relationship between the distribution of  
248 endogenous NM-II and actin MPS along the axon shaft, we used dual-colour 3D-SIM .  
249 We co-labeled the axons of DIV14 rat hippocampal neuron with phalloidin and an  
250 antibody that recognizes the C-terminus central domain of NM-IIB ( $\alpha$ NM-II(ct)), the  
251 dominant form of NM-II in axons<sup>24</sup>, and we observed that NM-II exhibited a periodic  
252 distribution (Fig. 6a, b), with an average spacing of  $197.5 \pm 3.1$  nm (Fig. 6c, d), which  
253 is similar to the periodicity determined by the autocorrelation method ( $187.4 \pm 9.8$  nm,  
254 Fig. 6e). To further examine the orientation and periodicity of the NM-II filaments  
255 along the axon, we used another NM-IIB antibody that recognizes its N-terminal head  
256 domain ( $\alpha$ NM-II(nt)) and which was previously used to detect a bipolar structure of  
257 NM-II filaments with super-resolution microscopy<sup>38, 39</sup>. Using super-resolution  
258 stimulated emission depletion (STED) microscopy (sFig. 3a), we found that the  
259  $\alpha$ NM-IIB(nt) stained for a bipolar structure that had a periodic spacing of  $206.4 \pm 2.6$   
260 nm along the axons (sFig. 3c). These values were consistent with that of  
261 phosphorylated-MLC spacing, as reported recently<sup>24</sup>. Interestingly, these bipolar NM-  
262 II structures presented a perpendicular orientation to the axon axis in both mono-  
263 colored  $\alpha$ NM-IIB(nt) stained axons detected by 3D-STED (sFig. 3b) and the dual-  
264 colored  $\alpha$ NM-IIB(nt) and  $\alpha$ NM-IIB(ct) co-stained axons detected by 3D-SIM (sFig.  
265 3d, e).

266

267 We also examined the correlation between the actin and NM-II MPS distribution, and  
268 noted that they exhibited both overlapping (arrows, Fig. 6b; sFig. 4a, b) and  
269 alternating (arrowheads, Fig. 6b; sFig. 4a, b) distribution patterns, which were  
270 reflected by the high cross-correlation coefficient of  $0.684 \pm 0.091$  (Fig. 6f, at 0 nm  
271 shift). However, we failed to detect an obvious cross-periodicity between actin and  
272 NM-II (Fig. 6f), which was probably due to the fact that the periodicity between these  
273 two patterns is beyond the resolution limit of SIM (~100 nm). We next investigated  
274 whether the localization pattern of NM-II was affected by the inhibition of its activity,  
275 and found that short-term blebbistatin treatment did not significantly change the NM-  
276 II spacing (Fig. 6c-e), but significantly decreased the degree of cross-correlation  
277 between NM-II and actin MPS ( $0.414 \pm 0.073$  (0 nm); Fig. 6f). Indeed, it was  
278 apparent that NM-II and actin MPS distributed more discretely from each other in the  
279 axons of blebbistatin-treated neurons (Fig. 6a, b, bottom panels). This reduction in  
280 NM-II and actin correlation was further supported by the reduced colocalization  
281 between NM-II and actin voxels following blebbistatin treatment, as resolved from  
282 the 3D-SIM images (sFig. 4b-d).

283

284 To confirm that the NM-II indeed correlated with actin MPS in the subcortical  
285 network, which is associated with the axonal plasma membrane, we adopted the  
286 method of Triton X-100 extraction before fixation to specifically remove the  
287 subcortical actin MPS components as previously reported<sup>20</sup>. Following this extraction,  
288 we observed a significant reduction in actin MPS (sFig. 4e, f), confirming the  
289 disruption of the membrane-associated actin MPS. Together with this reduction, we  
290 detected a dramatic reduction in NM-II positive puncta (sFig. 4e, g). This concomitant

291 decrease in both actin MPS and NM-II (sFig. 4h) further supports the notion that NM-  
292 II correlates with actin MPS in the membrane-associated subcortical network.  
293 Together, these results indicate that NM-II controls the contraction of the subcortical  
294 actin MPS, which underlies the radial contractility of axons.

295

296 ***Short-term inhibition of NM-II activity causes sustained axon dilation and***  
297 ***interferes with the long-range retrograde trafficking of large cargoes.***

298 To test whether axon radial contractility has a functional role in cargo transport, we  
299 examined the effect of blebbistatin on retrograde axonal trafficking in neurons grown  
300 in a 6-well microfluidic device (sFig. 5a), where we could restrict the action of  
301 blebbistatin to the axon segments by adding it through the middle chamber (sFig. 5b).  
302 Widespread dilation of the axons diameter along their longitudinal direction was  
303 observed following 90 min of blebbistatin incubation (sFig. 5c-e). To test the integrity  
304 of these treated axons, we further examined the axonal microtubule structure by dual-  
305 color SIM using a  $\beta$ -tubulin III antibody and phalloidin (sFig. 5f). We found that  
306 neither the microtubule bundle intensity (sFig. 5g) nor width (sFig. 5h) were affected  
307 by 60 min blebbistatin treatment. This blebbistatin treatment also failed to affect the  
308 mitochondrial anchoring, as the movement of the immobile mitochondrial fraction  
309 was not affected (sFig. 5i, j), whereas the mobile fractions with the higher average  
310 speeds were significantly increased by the blebbistatin movement (sFig. 5i, j),  
311 suggesting that the NM-II-dependent axonal contractility is likely to affect the cargo  
312 transport.

313

314 To further assess the effects of axonal contractility on cargo trafficking, we examined  
315 the impact of disrupting NM-II activity on retrograde trafficking in short-term

316 blebbistatin-treated axons. The average speed of CTB-positive carriers before (pre)  
317 and after (+BLB) blebbistatin treatment for 60 min (Fig. 7a) were compared. As  
318 demonstrated earlier (Fig. 1g), small carriers moved faster than large ones in the  
319 absence of blebbistatin (Fig. 7b), whereas blebbistatin treatment specifically increased  
320 the trafficking speed of large CTB-positive carriers, but not that of small ones (Fig. 7b  
321 and sMov. 4). Similarly, an increase of the average speed was observed for large  
322 Lysotracker-positive carriers, but not for small ones (Fig. 7c, sMov. 5). These results  
323 indicate that the short-term relaxation of the axonal actomyosin-II network has an  
324 initial positive impact on the trafficking of large cargoes, suggesting that axon radial  
325 contractility exerts a local brake on their transport.

326

327 Given that the large CTB-positive carrier population showed the most significant  
328 increase in speed upon blebbistatin treatment (Fig. 7b), we chose this type of carriers  
329 for more detailed motion analyses, in order to further dissect the impact of radial  
330 contractility on axonal transport. By tracking the transport of individual CTB-carriers  
331 within the microfluidic channels (Fig. 7a), we noted that their trajectories were  
332 predominately composed of two mobility states: (i) a fast-moving state and (ii) a  
333 stalled state, as indicated by the sloped and the vertical lines, respectively, in the  
334 displacement-time plot (Fig. 7d). Following 60 min blebbistatin treatment, the speed  
335 of the fast-moving state was significantly increased, as indicated by the flatter slopes  
336 (Fig. 7d), whereas in the stalled state we observed pronounced back-and-forth motion  
337 (Fig. 7d, asterisks and sMov. 4), which has been previously described as low-  
338 efficiency trafficking pattern for long-range cargo transport<sup>40</sup>. We noticed an increase  
339 in the ratio of the fast-moving CTB-carriers (sFig. 5k) and a decrease in that of the  
340 slow-moving ones (sFig. 5k). To further quantify these back-and-forth movements,

341 we compared the ratio of direction swap ( $Sr$ ) in these tracks by measuring the ratio of  
342 the time cargoes spent travelling in the reverse direction ( $t_{rev}$ ) in relation to the total  
343 time travelled ( $t_{total}$ ), as shown in equate (1), with  $k$  being the number of trajectories.

$$344 \quad Sr = \frac{\sum_{k=0}^n t_{rev}^k}{\sum_{k=0}^n t_{total}^k} \square 1 \square$$

345 This analysis revealed that blebbistatin treatment significantly increased the amount  
346 of time cargoes underwent reverse motion, thereby increasing the ratio of direction  
347 swap in cargoes moving along the axon (Fig. 7e). Accordingly, we found that  
348 blebbistatin treatment decreased the number of CTB-positive carriers that traversed  
349 the imaging window within a given time (Fig. 7f), suggesting that the overall  
350 retrograde trafficking efficiency was reduced. These results support the positive role  
351 of axonal radial contractility in maintaining near-unidirectional retrograde trafficking,  
352 thereby ensuring the overall efficiency of long-range retrograde transport.

353

354 We next investigated how the radial contractility impacted the mobility of the fast-  
355 moving and stalled carriers, respectively, by analyzing the dynamics of the CTB-  
356 positive carrier movements. To objectively and quantitatively analyze the effect of the  
357 contractility on the two motion states, we employed a two-state hidden Markov model  
358 (HMM) to annotate these CTB trajectories into stalled (D) and transport (DV) states  
359 (Fig. 7g), as previously described<sup>28</sup>. The separating efficacy of this model was  
360 demonstrated by the fact that the step size of the stalled ( $0.1168 \pm 0.45 \mu\text{m}$ ) and  
361 transport states ( $0.4352 \pm 1.53 \mu\text{m}$ ) were distinct from each other. We then examined  
362 the effect of blebbistatin treatment, and found that it significantly increased the step  
363 size of large CTB-positive carriers in the DV state (Fig. 7h, pink spots), which is in  
364 good agreement with our earlier observations (Fig. 7b and sMov. 4). For the D state in

365 pretreated axons, CTB-positive carriers exhibited a much smaller step size (Fig. 7h),  
366 meaning that the mobility of these stalled carriers was constrained. However, this  
367 limited step size was significantly increased following 60 min blebbistatin treatment  
368 (Fig. 7h, blue spots). Consistent with the increased back-and-forth movements (Fig.  
369 7d, e), this result suggests that the mobility of the stalled carriers is increased  
370 following disruption of NM-II activity. Taken together, our findings indicate that the  
371 axonal actomyosin network maintains radial constriction, which not only impedes the  
372 speed of the fast-moving state but also suppresses the low-efficiency back-and-forth  
373 movement during the stall state of these long-range carriers. The overall impact of this  
374 contractility on long-range trafficking is therefore positive, which facilitates the uni-  
375 directionality and the overall efficiency of long-range retrograde carriers.

376

377 ***Prolonged inactivation of actomyosin-II causes focal axon swelling accompanied***  
378 ***with stalled cargo accumulation.***

379 In addition to 60 min blebbistatin treatment, we also examined the impact of longer  
380 exposure to blebbistatin on both axon structure and trafficking. We discovered that  
381 prolonged blebbistatin treatment (60 - 120 min) increased the percentage of axons  
382 with focal swellings (Fig. 8a, b), which was represented by the gradual formation of  
383 FAS (Fig. 8a), with these FAS becoming prevalent ( $59.85 \pm 5.159$  %) following long-  
384 term blebbistatin treatment (10  $\mu$ M, 120 min, Fig. 8b). As FAS is a hallmark of  
385 irreversible axonal damage<sup>11</sup>, these results suggested that disrupting radial  
386 contractility could directly lead to FAS and ensuing axonal degeneration.

387

388 To fully assess the effects of radial axon contractility on retrograde cargo trafficking,  
389 we further resolved the impact of long-term NM-II inhibition on the long-range



390 trafficking of retrograde endosomal CTB-positive carriers (Fig. 8c). We found that  
391 both the trafficking speed (Fig. 8d) and transverse frequency (Fig. 8e) of these carriers  
392 were significantly reduced after 120 min blebbistatin treatment. To assess whether the  
393 axonal radial contractility affects trafficking efficiency of other retrograde cargoes,  
394 we also compared the trafficking efficacy of autophagosome (LC3-mRFP labelled),  
395 which undergoes long-range retrograde trafficking<sup>8, 41</sup>, in axons in the presence or  
396 absence of blebbistatin (120 min treatment). We found that similar to CTB-positive  
397 carriers, the trafficking speed of these LC3-mRFP-positive carriers was also  
398 significantly reduced (Fig. 8f, g). Importantly, we also observed the gradual  
399 accumulation of the stalled LC3-carriers at FAS (Fig. 8f, h). In addition to  
400 pharmacological inactivation of NM-II, we also transfected the myosin-II regulatory  
401 light chain with the S19AT18A mutations, (MRLC<sup>mut</sup>-GFP), which abolishes the  
402 ability of NM-II to bind to and slide along the F-actin<sup>42</sup>. We found that 48 hours after  
403 MRLC<sup>mut</sup>-GFP transfection, the structural integrity of transfected axons was  
404 significantly disrupted as reflected by the significantly increased diameter fluctuations  
405 (Fig. 8i, j) and FAS formation (Fig. 8k) compared to those transfected with wild-type  
406 controls (MRLC<sup>wt</sup>-GFP). These results suggest that the long-term inactivation of  
407 actomyosin-II not only impairs axonal trafficking but also causes irreversible  
408 structural damage to the axon, which may eventually lead to its degeneration.

409

## 410 **Discussion**

411 Many factors affect long-range axonal cargo trafficking, including the number and  
412 type of attached molecular motors<sup>43, 44</sup>, the polarity of the microtubule tracks<sup>45</sup>, and  
413 friction from other organelles<sup>46</sup>. With the development of live-imaging microscopy,  
414 most of these factors have been extensively studied in cell-free *in vitro* systems<sup>44</sup>, and  
415 within the axons of cultured neurons<sup>32, 47</sup> and live animals<sup>48</sup>. However, the impact of  
416 the narrow and rigid axonal plasma membrane on the transiting cargoes remains  
417 largely elusive. In this study, we have demonstrated that the transport of large  
418 membrane-bound cargoes causes an acute, albeit transient, radial stretching of the  
419 axonal plasma membrane, which is immediately restored by constitutive constricting  
420 forces generated by the membrane-associated periodic actomyosin-II network. We  
421 have also identified NM-II as a critical regulator of this radial contractility, which  
422 controls not only the speed but also the directionality of long-range cargo trafficking  
423 along the axon. Inactivation of this contractility machinery eventually leads to stalled  
424 cargo trafficking and FAS, which are early signs of axon degeneration. Our study  
425 therefore reveals novel functions of the actomyosin-II network in facilitating the  
426 efficacy of long-range axonal trafficking and maintaining the structural stability of  
427 CNS axons.

428

429 ***Radial contractility facilitates the overall efficiency of long-range retrograde axonal***  
430 ***trafficking.***

431 An efficient long-range retrograde cargo transport machinery is critical for the  
432 survival and function of neurons<sup>1, 2, 48</sup>. Retrograde trafficking is thrust by  
433 cytoplasmic dynein<sup>49</sup>, which drives the near-unidirectional retrograde transport of

434 nerve terminal-derived signalling endosomes and autophagosomes to the cell body<sup>8, 32</sup>.  
435 Detailed analysis of the movement of these carriers has revealed that they are mainly  
436 composed of fast-moving retrograde-directed and stalled carriers, with less than 3%  
437 being reverse-directed (anterograde) carriers<sup>8, 27</sup>. A similar near uni-directional motion  
438 pattern is shared by retrograde endosomes carrying nerve growth factor (NGF)<sup>32</sup> and  
439 tetanus toxins<sup>50</sup>. The retrograde directionality of the fast-moving cargoes is driven by  
440 the progressive minus-end-directed dynein steps, the directionality of which is  
441 dependent on the opposing forces they received<sup>49</sup>. Actomyosin controls radial  
442 contractility, which poses a steric hindrance to the passing cargoes<sup>46</sup> and therefore  
443 could potentially affect the opposing force to their driven dyneins. However, the  
444 effect of the axonal actomyosin network on the dynein-driven trafficking is poorly  
445 understood. Early studies provided evidence that disrupting F-actin in axons does not  
446 interfere with organelle transport, which continues unabated or at an even faster rate<sup>51</sup>,  
447 suggesting that the axonal F-actin network acts as a physical impediment to cargo  
448 transport. In line with this, we found that short-term blebbistatin treatment released  
449 subcellular tension, causing an expansion of the axon diameter and specifically  
450 increasing the transport speed of large cargoes. Our results therefore confirm that the  
451 fast-moving state of large cargoes is subjected to a constant impediment from radial  
452 axonal constriction. On the other hand, the stalling of retrograde carriers is likely to be  
453 caused by either a balanced tug-of-war between kinesin and dynein<sup>52</sup>, or the transient  
454 detachment of dynein-driven carriers from the microtubule tracks<sup>40, 49</sup>. Our data using  
455 HMM-Bayesian partition show an increased mobility of stalled carriers after  
456 blebbistatin treatment, which suggests that axonal radial constriction might affect the  
457 microtubule attachment/tethering of these stalled carriers within the axon. This could  
458 be due to the tension-dependent tethering of dynein to the microtubule tracks<sup>53</sup>.

459 However, further study on the coordination between cargo trafficking and local axon  
460 radial tension, using higher temporal resolution live-imaging techniques, is needed to  
461 establish the precise relationship between axonal radial constriction and the motion of  
462 various-sized retrograde carriers.

463

464 ***The actomyosin-II network is the structural basis for the contractility of axon shafts.***

465 The diameter of the long and thin axon has long been believed to be uniform for the  
466 same type of neurons. However, with the development of 3D EM reconstruction,  
467 diameter fluctuations have been detected along the length of axons in optical nerves<sup>10</sup>.  
468 Similarly, in live rat brains, axonal diameter fluctuations were revealed with super-  
469 resolution microscopy after the conduction of action potentials<sup>54</sup>. Consistent with  
470 these *in vivo* studies, we have used EM, SR-SIM and bright-field confocal microscopy  
471 to reveal that axons undergo dynamic diameter fluctuations. With time-lapse SR-SIM  
472 and confocal microscopy, we further correlated the dynamic radial expansion of the  
473 axonal diameter with the passage of large cargoes. These deformations are highly  
474 correlated with the transit of various types of large cargoes and are therefore most  
475 likely caused by this. These transient deformations also suggest the existence of a  
476 mechanical tension derived from the axonal plasma membrane. Atomic force  
477 microscopy studies have identified the axon as the most rigid neuronal segment,  
478 which is under constitutive tension<sup>12</sup> from the ordered periodic longitudinal  
479 MPS composed of actin, spectrin, adducin and associated proteins<sup>18</sup>. Disruption of  
480 actin and spectrin abolished the actin MPS, whereas adducin depletion did not affect  
481 its spacing but still caused dilation and degeneration of axons<sup>16</sup>. However, the radial  
482 contractility of adducin knockout axons remained unaltered, suggesting the existence  
483 of an alternative mechanism for the contractility along the axon shafts.

484

485 In mammalian cells, radial contractility of subcortical actin<sup>55</sup> or actin rings<sup>35</sup> is  
486 regulated by mechanosensory NM-II, which is the major cytoskeletal complex in  
487 neurons with the ability to convert ATP into mechanical force. Recently, the activated  
488 form of NM-II light chain (pMLC) was shown to distribute in a similar periodicity  
489 and largely overlap with the actin MPS at the AIS<sup>24</sup>. Moreover, depolarization rapidly  
490 decreased NM-II activity, further suggesting that this constricting structure is highly  
491 dynamic<sup>24, 56</sup>. Consistent with these previous studies, we reveal a periodic pattern of  
492 NM-II of ~200 nm by dual labelling with phalloidin-647 and an NM-IIB C-terminus  
493 antibody. In addition, cross-correlation analysis of these two MPS demonstrates a  
494 substantial colocalization, which is significantly reduced by blebbistatin-induced NM-  
495 II detachment. Further, our results demonstrate that NM-II periodicity goes far  
496 beyond the AIS, and confirm the existence of periodic actomyosin rings, which  
497 provide the structural basis for axonal radial contractility. Higher resolution three-  
498 colour microscopic techniques are needed to further resolve the precise  
499 conformational changes that occur at the level of the actomyosin-II MPS as large  
500 cargoes pass through.

501

502 Over-expansion of axonal segments, such as FAS, has been noted in several  
503 neurodegenerative diseases, with the accumulation of organelles and cargoes at the  
504 axonal swellings - the presence of FAS is generally regarded as an early sign of  
505 axonal degeneration<sup>11</sup>. Similar to FAS, diameter dilation, cargo accumulation and  
506 degeneration were also observed in axons of adducin knock out mice<sup>16</sup>, as well as in  
507 axons following prolonged blebbistatin treatment (>120 min) or transfection with the  
508 inactive MRLC mutant in this study, suggesting that the actomyosin-II-dependent

509 radial contractility is critical to maintain the structural stability of the axon. Additional  
510 studies will be required to directly characterize the contractility changes in FAS and  
511 to examine whether enhancing radial contractility could have any rescuing effect.

512

513 In summary, we have uncovered an inverse correlation between axonal cargo size and  
514 trafficking speed, and demonstrated that axons undergo transient deformation caused  
515 by the cargo transition in hippocampal axon bundles. We have further identified the  
516 periodic structure of actomyosin-II along the axon shaft as the structural basis of  
517 axonal radial contractility. We have also characterized its role in facilitating long-  
518 range cargo trafficking by restricting inefficient back-and-forth cargo movement  
519 during the stall state. Our data identify a novel role for the axonal actomyosin-II  
520 network in long-range cargo trafficking, and highlight the importance of axonal  
521 membrane tension in ensuring the efficiency of this trafficking.

522

523 **Online Methods**

524 *Antibodies, molecular reagents and DNA constructs*

525 Alexa-555- and Alexa-647-conjugated recombinant CTB were obtained from  
526 ThermoFisher Scientific (#c-34776, #c-34777). Mouse anti-synaptobrevin-2 (VAMP2)  
527 antibody was obtained from Synaptic Systems (#104 211) and the rabbit anti-NM-  
528 IIB(ct) polyclonal antibodies were from Sigma-Aldrich (#M7939), mouse anti-NM-  
529 IIB(nt) monoclonal from Santa Cruz (sc-376954). Alexa-647-phalloidin was  
530 purchased from Invitrogen (#A22287), while the mouse anti-  $\beta$ -tubulin III was from  
531 Covance (#MMS-435P). Alexa Fluor secondary antibodies were purchased from Life  
532 Technologies. The DNA construct encoding Lifeact-GFP was provided by Roland  
533 Wedlich Soldner (MPI Biochemistry, Martinsried), pTagRFP-mito was purchased  
534 from Evrogen (#FP147), pmRFP-LC3 was a gift from Tamotsu Yoshimori (Addgene  
535 plasmid # 21075). LysoTracker Deep Red came from ThermoFisher (#L12492). The  
536 remaining reagents were obtained from Electron Microscopy Sciences or Sigma  
537 Aldrich unless otherwise specified.

538

539 *Neuronal cultures*

540 Hippocampal neurons were cultured from embryonic day 18 (E18) embryos from  
541 Sprague Dawley rats. All experiments were approved by The University of  
542 Queensland Animal Ethics Committee. Hippocampal neurons were prepared as  
543 described previously<sup>8</sup> and were plated on either glass coverslips (for confocal  
544 microscopy), plastic dishes (for EM) or in microfluidic chambers (Xona, #RD450)  
545 according to the manufacturer's protocol<sup>57</sup>. For the pretreated groups, live-imaging of  
546 approximate 5 (30×12  $\mu$ m) regions of interest (ROIs) was performed 2 h after the  
547 CTB labelling. For blebbistatin treatment, conditioned culture medium containing

548 blebbistatin (10  $\mu$ M) was only added to the middle and/or terminal chambers of the 6-  
549 well or 4-well microfluidic chambers (Xona, #TCND500; #RD450) to exclude its  
550 effect on the soma. For the short-term blebbistatin treatment, microfluidic devices  
551 were immediately returned to the 37°C imaging chamber for live imaging, and  
552 approximately 5 ROIs were imaged within a total duration of 60 min. For long-term  
553 blebbistatin treatment, microfluidic devices were returned to a 37°C CO<sub>2</sub> incubator for  
554 an additional 2h before continuing the live imaging.

555

### 556 ***Confocal microscopy***

557 Stimulation and labelling were carried out on rat hippocampal neurons cultured in  
558 microfluidic chambers between day *in vitro* 14 (DIV14). Briefly, the culture medium  
559 was removed from all chambers and the neurons were incubated for 5 min at 37°C in  
560 labelling buffer (15 mM HEPES, 95 mM NaCl, 56 mM KCl, 2.2mM CaCl<sub>2</sub>, 0.5mM  
561 MgCl<sub>2</sub>, 5.6mM D-glucose, 0.5 mM ascorbic acid, 0.1% bovine serum albumin (BSA),  
562 pH 7.4), with 50 ng/ml CTB-Af555 or CTB-Af647 added to the nerve terminal  
563 chambers only. For LysoTracker labelling, the incubation time was 30 min. Neurons  
564 were then washed 3 times with warm neurobasal medium and returned to the original  
565 conditioned growth medium for 2 h prior to imaging. Images were acquired with a  
566 Zeiss LSM710 inverted microscope maintained at 37°C and 5% CO<sub>2</sub>, and movies  
567 were analysed for carrier kinetics using the spot function of Imaris software  
568 (Imaris7.7-9.2, Bitplane). Kymographs were generated using ImageJ software (NIH)  
569 using the plugin Multi-Kymograph for ImageJ. For immunofluorescence microscopy  
570 of fixed cells, the microfluidic devices were removed and neurons were subsequently  
571 fixed for 2-4 h at 4°C with phosphate buffered saline (PBS) containing 4%  
572 paraformaldehyde and 4% sucrose, followed by immunostaining as previously



573 described<sup>27</sup>. Permeabilization was performed using 0.1% saponin, 0.2% gelatin, and 1%  
574 BSA in PBS. Imaging was carried out on a Zeiss LSM710 confocal microscope and  
575 analysed with Zen (Zeiss) and ImageJ softwares. All images were compiled using  
576 Illustrator CS 5.1 (Adobe).

577

### 578 ***Imaris tracing of axonal cargoes***

579 Time-lapse movies of CTB-positive or LysoTracker-positive carriers were analysed  
580 for carrier kinetics using the spot function of Imaris software (Imaris7.7-9.2, Bitplane).  
581 In brief, region growth was enable (threshold 50, diameter from border mode),  
582 estimated diameter 0.75  $\mu\text{m}$ , tracing with autogressive motion (Max Distance 2  $\mu\text{m}$ ,  
583 Max Gap size 0). Resulted trajectories were filtered with duration > 10 s and instant  
584 speed > 0.07  $\mu\text{m}/\text{s}$ . Average speed are calculated as track length divided by track  
585 duration. For LysoTracker-positive carriers that bleaches rapidly, only the diameter of  
586 the first time point in each trajectory were used as the diameter for size grouping.

587

### 588 ***Co-labelling of F-actin and NM-II for SR-SIM***

589 Cultured rat hippocampal neurons were fixed at DIV14. For dual-colour imaging of  
590 actin and NM-IIB, the fixation protocol was modified from that previously established  
591 for maintaining actin ultrastructure<sup>18</sup>. Briefly, the samples were initially fixed in 4%  
592 paraformaldehyde dissolved in cytoskeleton buffer (CB, 10 mM MES, 150 mM NaCl,  
593 5 mM EGTA, 5 mM glucose and 5 mM  $\text{MgCl}_2$ , pH 6.1) for 30 min at room  
594 temperature and then blocked with antibody dilution buffer (2% BSA with 0.1%  
595 Triton X-100 in PBS) for 1 h at room temperature, after which the primary antibody  
596 (NM-IIB, diluted 1 in 500) and phalloidin-Af647 (0.14  $\mu\text{M}$ ) in 2% BSA in PBS were  
597 applied to the dish and incubated at 4°C overnight. Donkey anti-rabbit secondary

598 antibody (Thermofisher, #A-21206) was diluted at 1/500 and incubated for 1h at room  
599 temperature. Samples were immediately mounted in Vectashield medium (Vector  
600 Laboratories, #H-1000) for SIM imaging. For the Triton X-100 extraction experiment,  
601 neurons were first treated with the extraction buffer (4% paraformaldehyde, 0.1% (v/v)  
602 Triton X-100, 1 µg/ml phalloidin in CB) for 45 s before the fixation and staining steps.  
603

#### 604 *Structured illumination microscopy*

605 Imaging of live or fixed samples was performed using an ELYRA PS1 SR-SIM  
606 system (Zeiss) equipped with a 100x objective ( $\alpha$  Plan-Apochromat 100×/1.46 oil-  
607 immersion DIC M27) and a CMOS camera (PCO Scientific). For live-imaging of the  
608 Af555-CTB- labelled neurons, images were obtained with the Fastframe mode (100  
609 ms exposure time, a time serie of 200 frames at 1.44 s intervals, a SIM grating size of  
610 42 µm at 561 nm wavelengths, and using 3 rotations). For fixed and stained samples,  
611 images were obtained by acquiring z-stacks of 10-16 slices with a spacing of 0.101  
612 µm, an exposure time of 100 ms, a SIM grating size of 42-51 µm, and using five  
613 rotations. 3D structured illumination images were then aligned and processed using  
614 the Zen software. For cross-correlation analysis, line profiles were selected based on  
615 the standard of the existence of at least 4 consecutive NM-II peaks in a single axon  
616 shafts. The intensity profiles of each of the channels were then obtained using the  
617 Multichannel plot profile function of BAR collection (DOI10.5281/zenodo.28838) in  
618 ImageJ software (NIH). The auto-correlation or cross-correlation rate between the  
619 different channels was then examined using the xcorr function of Matlab. The  
620 correlation values for each axon segment were averaged and plotted.

621

#### 622 *Simulated emission depletion (STED) microscopy*

623 Cultured rat hippocampal neurons (DIV14-17) cultured in glass bottom dishes were  
624 imaged on a Leica SP8 confocal with STED 3X. (DMI8 stand with 775nm, 660nm  
625 592nm STED lasers and a white-light tuneable laser for excitation). Images were  
626 acquired using the HC plan apochromat 100x 1.4 NA oil immersion objective using  
627 Leica LASX software with 3 frame accumulations as multi-slice z-stacks.  
628 Deconvolution was performed using up to 40 cycles of iterative deconvolution using  
629 Huygens Professional. Images were visualised and maximum intensity projected  
630 using FIJI (NIH).

631

### 632 *Assessment of actin MPS and NM-II abundance*

633 Periodic cytoskeletal structures (MPS) are defined as the axonal regions with at  
634 least 4 consecutive actin or NM-II peaks along the longitudinal direction. 5-7 of 5  
635  $\mu\text{m} \times 5 \mu\text{m}$  ROIs were selected along the axons in each 3D-SIM image (50  
636  $\mu\text{m} \times 50 \mu\text{m}$ ). In each ROI, the length of axon with F-actin MPS was measured  
637 with ImageJ by a trained observer blind to the treatment conditions. In the same  
638 ROI, the particle number of NM-II staining was also automatically quantified with  
639 the Analyse Particle plugin of FIJI. MPS or NM-II abundance were then calculated  
640 as the percentage of segments length with an MPS or particle number over the total  
641 length of axons in the ROI respectively.

642

### 643 *Electron microscopy*

644 Rat hippocampal neurons cultured in microfluidic devices (14-17 DIV) were treated  
645 as described for confocal microscopy<sup>27</sup>, except that 10  $\mu\text{g}/\text{ml}$  CTB-HRP was added to  
646 the nerve terminal chambers for the period of stimulation. Cells were returned to  
647 growth medium for 4 h prior to fixation. All cells were fixed in 2.5% glutaraldehyde

648 for 24 h. Following fixation, they were processed for 3, 39-diaminobenzidine (DAB)  
649 cytochemistry using the standard protocol. Fixed cells were contrasted with 1%  
650 osmium tetroxide and 4% uranyl acetate prior to dehydration and embedding in LX-  
651 112 resin<sup>58</sup>. Sections (~50 nm) were cut using an ultramicrotome (UC64; Leica). To  
652 quantify CTB-HRP endocytosis, presynaptic regions were visualized at 60,000x using  
653 a transmission electron microscope (model 1011; JEOL) equipped with a Morada  
654 cooled CCD camera and the iTEM AnalySIS software. Membrane-bound  
655 compartments within the cell soma proximal region of the microfluidic channel were  
656 analysed, and the axon diameter measured using ImageJ software.

657

#### 658 *HMM-Bayes analysis*

659 Hidden Markov model (HMM) method was used to predict the particle hidden states  
660 and the state transition probabilities from experimental trajectories. By using  
661 Bayesian model selection in the inference process, the simplest mobility model can be  
662 selected to describe these trajectories in an objective manner<sup>59</sup>. We analysed the  
663 trajectories from each cell of interest using HMM-Bayes software<sup>60</sup>. A maximum of 2  
664 hidden states was set to describe the trajectory movements, diffusion motion (D) and  
665 active transport state (DV), which were used to describe the stalled state and the fast-  
666 moving state, respectively. In our cases, at least 10 channel ROIs were quantified for  
667 the control group and the blebbistatin-treated group, with corresponding trajectory  
668 numbers being 126 and 190 respectively. The D state with a low apparent diffusion  
669 coefficient state representing the immobile unattached movement. The DV state,  
670 which could be described by averaged velocity, represents the active transport  
671 attached movement. All of the analyses were performed using Matlab (R2016a,

672 MathWorks, Inc.). The average step sizes of different transport states was calculated  
673 from all D-DV models.

674

#### 675 *Statistics*

676 We used GraphPad Prism 7 (GraphPad Inc.) for statistical analyses. Results are  
677 reported as mean  $\pm$  s.e.m. For group comparisons, two-tailed nonparametric *t*-tests  
678 or paired *t*-tests were executed. *P* values  $< 0.05$  indicated statistical significance.  
679 No statistical methods were used to predetermine sample sizes. Data distribution was  
680 assumed to be normal, but this was not formally tested. There was no formal  
681 randomization. Data collection and analysis were performed by different operators,  
682 who were blind to the conditions of the experiments.

683

684 **References**

- 685 1. Tojima, T. & Kamiguchi, H. Exocytic and endocytic membrane trafficking in  
686 axon development. *Dev Growth Differ* **57**, 291-304 (2015).
- 687 2. Barford, K., Deppmann, C. & Winckler, B. The neurotrophin receptor  
688 signaling endosome: Where trafficking meets signaling. *Dev Neurobiol* **77**,  
689 405-418 (2017).
- 690 3. Liewald, D., Miller, R., Logothetis, N., Wagner, H.J. & Schuz, A. Distribution  
691 of axon diameters in cortical white matter: An electron-microscopic study on  
692 three human brains and a macaque. *Biol Cybern* **108**, 541-57 (2014).
- 693 4. Perge, J.A., Niven, J.E., Mugnaini, E., Balasubramanian, V. & Sterling, P.  
694 Why do axons differ in caliber? *J Neurosci* **32**, 626-38 (2012).
- 695 5. Mizushima, N., Ohsumi, Y. & Yoshimori, T. Autophagosome formation in  
696 mammalian cells. *Cell Struct Funct* **27**, 421-9 (2002).
- 697 6. McBride, H.M., Neuspiel, M. & Wasiak, S. Mitochondria: More than just a  
698 powerhouse. *Curr Biol* **16**, R551-60 (2006).
- 699 7. Altick, A.L., Baryshnikova, L.M., Vu, T.Q. & von Bartheld, C.S. Quantitative  
700 analysis of multivesicular bodies (mvbs) in the hypoglossal nerve: Evidence  
701 that neurotrophic factors do not use mvbs for retrograde axonal transport. *J*  
702 *Comp Neurol* **514**, 641-57 (2009).
- 703 8. Wang, T., *et al.* Control of autophagosome axonal retrograde flux by  
704 presynaptic activity unveiled using botulinum neurotoxin type-a. *Journal of*  
705 *Neurochemistry* **134**, 165 (2015).
- 706 9. Yin, X., *et al.* Proteolipid protein-deficient myelin promotes axonal  
707 mitochondrial dysfunction via altered metabolic coupling. *J Cell Biol* **215**,  
708 531-542 (2016).

- 709 10. Giacci, M.K., *et al.* Three dimensional electron microscopy reveals changing  
710 axonal and myelin morphology along normal and partially injured optic  
711 nerves. *Sci Rep* **8**, 3979 (2018).
- 712 11. Maia, P.D., *et al.* Diagnostic tools for evaluating the impact of focal axonal  
713 swellings arising in neurodegenerative diseases and/or traumatic brain injury.  
714 *J Neurosci Methods* **253**, 233-43 (2015).
- 715 12. Zhang, Y., *et al.* Modeling of the axon membrane skeleton structure and  
716 implications for its mechanical properties. *PLoS Comput Biol* **13**, e1005407  
717 (2017).
- 718 13. Wortman, J.C., *et al.* Axonal transport: How high microtubule density can  
719 compensate for boundary effects in small-caliber axons. *Biophys J* **106**, 813-  
720 23 (2014).
- 721 14. Fan, A., Tofangchi, A., Kandel, M., Popescu, G. & Saif, T. Coupled  
722 circumferential and axial tension driven by actin and myosin influences in  
723 vivo axon diameter. *Sci Rep* **7**, 14188 (2017).
- 724 15. Narayanareddy, B.R., Vartiainen, S., Hariri, N., O'Dowd, D.K. & Gross, S.P.  
725 A biophysical analysis of mitochondrial movement: Differences between  
726 transport in neuronal cell bodies versus processes. *Traffic* **15**, 762-71 (2014).
- 727 16. Leite, S.C., *et al.* The actin-binding protein alpha-adducin is required for  
728 maintaining axon diameter. *Cell Rep* **15**, 490-498 (2016).
- 729 17. Pesaresi, M., *et al.* Axon diameter and axonal transport: In vivo and in vitro  
730 effects of androgens. *Neuroimage* **115**, 191-201 (2015).
- 731 18. Xu, K., Zhong, G. & Zhuang, X. Actin, spectrin, and associated proteins form  
732 a periodic cytoskeletal structure in axons. *Science* **339**, 452-6 (2013).

- 733 19. Han, B., Zhou, R., Xia, C. & Zhuang, X. Structural organization of the actin-  
734 spectrin-based membrane skeleton in dendrites and soma of neurons. *Proc*  
735 *Natl Acad Sci U S A* **114**, E6678-E6685 (2017).
- 736 20. Zhong, G., *et al.* Developmental mechanism of the periodic membrane  
737 skeleton in axons. *Elife* **3** (2014).
- 738 21. He, J., *et al.* Prevalent presence of periodic actin-spectrin-based membrane  
739 skeleton in a broad range of neuronal cell types and animal species. *Proc Natl*  
740 *Acad Sci U S A* **113**, 6029-34 (2016).
- 741 22. Arnold, D.B. & Gallo, G. Structure meets function: Actin filaments and  
742 myosin motors in the axon. *J Neurochem* **129**, 213-220 (2014).
- 743 23. Papadopoulos, A., *et al.* Activity-driven relaxation of the cortical actomyosin ii  
744 network synchronizes munc18-1-dependent neurosecretory vesicle docking.  
745 *Nat Commun* **6**, 6297 (2015).
- 746 24. Berger, S.L., *et al.* Localized myosin ii activity regulates assembly and  
747 plasticity of the axon initial segment. *Neuron* **97**, 555-570 e6 (2018).
- 748 25. Kovacs, M., Toth, J., Hetenyi, C., Malnasi-Csizmadia, A. & Sellers, J.R.  
749 Mechanism of blebbistatin inhibition of myosin ii. *J Biol Chem* **279**, 35557-63  
750 (2004).
- 751 26. Tammineni, P., Ye, X., Feng, T., Aikal, D. & Cai, Q. Impaired retrograde  
752 transport of axonal autophagosomes contributes to autophagic stress in  
753 alzheimer's disease neurons. *Elife* **6** (2017).
- 754 27. Wang, T., *et al.* Flux of signalling endosomes undergoing axonal retrograde  
755 transport is encoded by presynaptic activity and trkb. *Nat Commun* **7**, 12976  
756 (2016).



- 757 28. Joensuu, M., *et al.* Visualizing endocytic recycling and trafficking in live  
758 neurons by subdiffractive tracking of internalized molecules. *Nat Protoc* **12**,  
759 2590-2622 (2017).
- 760 29. Joensuu, M., *et al.* Subdiffractive tracking of internalized molecules reveals  
761 heterogeneous motion states of synaptic vesicles. *J Cell Biol* **215**, 277-292  
762 (2016).
- 763 30. Rai, A.K., Rai, A., Ramaiya, A.J., Jha, R. & Mallik, R. Molecular adaptations  
764 allow dynein to generate large collective forces inside cells. *Cell* **152**, 172-82  
765 (2013).
- 766 31. Mallik, R., Petrov, D., Lex, S.A., King, S.J. & Gross, S.P. Building  
767 complexity: An in vitro study of cytoplasmic dynein with in vivo implications.  
768 *Curr Biol* **15**, 2075-85 (2005).
- 769 32. Chowdary, P.D., Che, D.L., Zhang, K. & Cui, B. Retrograde ngf axonal  
770 transport--motor coordination in the unidirectional motility regime. *Biophys J*  
771 **108**, 2691-703 (2015).
- 772 33. Riedl, J., *et al.* Lifeact: A versatile marker to visualize f-actin. *Nat Methods* **5**,  
773 605-7 (2008).
- 774 34. Ganguly, A., *et al.* A dynamic formin-dependent deep f-actin network in  
775 axons. *J Cell Biol* **210**, 401-17 (2015).
- 776 35. Gormal, R.S., Nguyen, T.H., Martin, S., Papadopoulos, A. & Meunier, F.A. An  
777 acto-myosin ii constricting ring initiates the fission of activity-dependent bulk  
778 endosomes in neurosecretory cells. *J Neurosci* **35**, 1380-9 (2015).
- 779 36. Ha, J., *et al.* A neuron-specific cytoplasmic dynein isoform preferentially  
780 transports trkb signaling endosomes. *J Cell Biol* **181**, 1027-39 (2008).

- 781 37. Qu, Y., Hahn, I., Webb, S.E., Pearce, S.P. & Prokop, A. Periodic actin  
782 structures in neuronal axons are required to maintain microtubules. *Mol Biol*  
783 *Cell* **28**, 296-308 (2017).
- 784 38. Hu, S., *et al.* Long-range self-organization of cytoskeletal myosin ii filament  
785 stacks. *Nat Cell Biol* **19**, 133-141 (2017).
- 786 39. Beach, J.R., *et al.* Nonmuscle myosin ii isoforms coassemble in living cells.  
787 *Curr Biol* **24**, 1160-6 (2014).
- 788 40. Yi, J.Y., *et al.* High-resolution imaging reveals indirect coordination of  
789 opposite motors and a role for lis1 in high-load axonal transport. *J Cell Biol*  
790 **195**, 193-201 (2011).
- 791 41. Maday, S., Wallace, K.E. & Holzbaur, E.L. Autophagosomes initiate distally  
792 and mature during transport toward the cell soma in primary neurons. *J Cell*  
793 *Biol* **196**, 407-17 (2012).
- 794 42. Beach, J.R., Licate, L.S., Crish, J.F. & Egelhoff, T.T. Analysis of the role of  
795 ser1/ser2/thr9 phosphorylation on myosin ii assembly and function in live  
796 cells. *BMC Cell Biol* **12**, 52 (2011).
- 797 43. Hancock, W.O. Bidirectional cargo transport: Moving beyond tug of war. *Nat*  
798 *Rev Mol Cell Biol* **15**, 615-28 (2014).
- 799 44. Vale, R.D., Malik, F. & Brown, D. Directional instability of microtubule  
800 transport in the presence of kinesin and dynein, two opposite polarity motor  
801 proteins. *J Cell Biol* **119**, 1589-96 (1992).
- 802 45. Kapitein, L.C. & Hoogenraad, C.C. Which way to go? Cytoskeletal  
803 organization and polarized transport in neurons. *Mol Cell Neurosci* **46**, 9-20  
804 (2011).

- 805 46. Che, D.L., Chowdary, P.D. & Cui, B. A close look at axonal transport: Cargos  
806 slow down when crossing stationary organelles. *Neurosci Lett* **610**, 110-6  
807 (2016).
- 808 47. Chowdary, P.D., *et al.* Nanoparticle-assisted optical tethering of endosomes  
809 reveals the cooperative function of dyneins in retrograde axonal transport. *Sci*  
810 *Rep* **5**, 18059 (2015).
- 811 48. Bilsland, L.G., *et al.* Deficits in axonal transport precede ALS symptoms in  
812 vivo. *Proc Natl Acad Sci U S A* **107**, 20523-8 (2010).
- 813 49. Gennerich, A., Carter, A.P., Reck-Peterson, S.L. & Vale, R.D. Force-induced  
814 bidirectional stepping of cytoplasmic dynein. *Cell* **131**, 952-65 (2007).
- 815 50. Lalli, G., Bohnert, S., Deinhardt, K., Verastegui, C. & Schiavo, G. The  
816 journey of tetanus and botulinum neurotoxins in neurons. *Trends Microbiol*  
817 **11**, 431-7 (2003).
- 818 51. Morris, R.L. & Hollenbeck, P.J. Axonal transport of mitochondria along  
819 microtubules and f-actin in living vertebrate neurons. *J Cell Biol* **131**, 1315-26  
820 (1995).
- 821 52. Belyy, V., *et al.* The mammalian dynein-dynactin complex is a strong  
822 opponent to kinesin in a tug-of-war competition. *Nat Cell Biol* **18**, 1018-24  
823 (2016).
- 824 53. Cleary, F.B., *et al.* Tension on the linker gates the atp-dependent release of  
825 dynein from microtubules. *Nat Commun* **5**, 4587 (2014).
- 826 54. Chereau, R., Saraceno, G.E., Angibaud, J., Cattaert, D. & Nagerl, U.V.  
827 Superresolution imaging reveals activity-dependent plasticity of axon  
828 morphology linked to changes in action potential conduction velocity. *Proc*  
829 *Natl Acad Sci U S A* **114**, 1401-1406 (2017).

- 830 55. Duan, R., *et al.* Spectrin is a mechanoresponsive protein shaping fusogenic  
831 synapse architecture during myoblast fusion. *Nat Cell Biol* **20**, 688-698  
832 (2018).
- 833 56. Evans, M.D., Tufo, C., Dumitrescu, A.S. & Grubb, M.S. Myosin ii activity is  
834 required for structural plasticity at the axon initial segment. *Eur J Neurosci* **46**,  
835 1751-1757 (2017).
- 836 57. Taylor, A.M., *et al.* A microfluidic culture platform for cns axonal injury,  
837 regeneration and transport. *Nat Methods* **2**, 599-605 (2005).
- 838 58. Harper, C.B., *et al.* Dynamin inhibition blocks botulinum neurotoxin type a  
839 endocytosis in neurons and delays botulism. *J Biol Chem* **286**, 35966-76  
840 (2011).
- 841 59. Persson, F., Linden, M., Unoson, C. & Elf, J. Extracting intracellular diffusive  
842 states and transition rates from single-molecule tracking data. *Nat Methods* **10**,  
843 265-9 (2013).
- 844 60. Monnier, N., *et al.* Inferring transient particle transport dynamics in live cells.  
845 *Nat Methods* **12**, 838-40 (2015).
- 846

847 **Acknowledgements**

848 This work was supported by grants from the Australian Research Council (ARC,  
849 DP170102402 to VA; ARC DE170100546 to TW) and the Australian National Health  
850 and Medical Research Council (NHMRC; GNT1138452 to VA and GNT1120381 to  
851 FAM). FAM is an NHMRC Senior Research Fellow (GNT1060075). TW is an ARC  
852 DECRA Fellow (DE170100546) and was previously supported by a The University  
853 of Queensland Postdoctoral Research Fellowship. HH and XJY were recipients of  
854 University of Queensland Research Training Scholarships. Imaging was performed at  
855 the Queensland Brain Institute's Advanced Microscopy Facility, generously  
856 supported by the Australian Government through the ARC LIEF Grant  
857 (LE130100078 to FAM). Electron microscopy was performed at the Australian  
858 Microscopy and Microanalysis Facility, The University of Queensland. The authors  
859 would like to thank Rowan Tweedale for editing the manuscript, and Joanne Jang,  
860 Rumelo Amor, Nicholas Condon, Luke Hammond, Nick Valmas and Rachel Gormal  
861 for expert technical assistance.

862

863 **Author contributions**

864 FAM and TW designed the study, supervised the project and wrote the manuscript.  
865 TW performed live-imaging microscopy, confocal and SIM experiments and analysed  
866 data. WL performed HMM separation and assisted with data analysis. SM designed  
867 and performed EM experiments and helped with data analysis. AP designed and  
868 performed the analysis of particle speed and swap, and helped with SIM. GS helped to  
869 develop the staining protocol for dual-colour SIM. XJY and HH helped with primary  
870 neuronal culture, transfection, analysis of LC3-mRFP data. VA supervised works  
871 conducted by XJY, HH and WL, and edited the manuscript. VL and PP helped with

872 the edition of the manuscript and the figures. All authors discussed the results and  
873 commented on the manuscript.

874

875 **Competing Interests**

876 The authors declare no competing interest.

877

878 **Materials & correspondence**

879 Correspondence and requests for materials should be addressed to Prof. Frederic A.

880 Meunier ([f.meunier@uq.edu.au](mailto:f.meunier@uq.edu.au)) and Dr Tong Wang ([t.wang4@uq.edu.au](mailto:t.wang4@uq.edu.au)).

881

882 **Data availability**

883 All other data supporting the findings of this study are available from the

884 corresponding authors upon reasonable request.

885

886 **Figure legends**

887 **Figure 1. The speed of retrograde axonal transport cargoes is inversely correlated**

888 **with their size.**

889 **(a)** Microfluidic chambers to isolate unidirectional axon bundles, bar =1 cm (adapted  
890 from [Xonamicrofluidics.com](http://Xonamicrofluidics.com)). **(b)** Schematic diagram of the pulse-chase labelling  
891 process. Cultured hippocampal neurons were grown in a microfluidic device for 14  
892 days *in vitro* (DIV). The nerve terminal chamber was incubated with fluorescently  
893 tagged CTB (50 ng/ml) for 5 min or LysoTracker Deep Red (50 nM) for 30 min  
894 (pulse). After thorough washes and a 2h chase. **(c)** Representative images of cultured  
895 neurons, showing the restriction of retrograde CTB surface labelling to nerve  
896 terminals and the position of the observation window (white box). Scale bar = 50  $\mu$ m.  
897 **(d)** The axonal retrograde transport of CTB or LysoTracker was monitored, at the level  
898 of the proximal axon shafts or in the nerve terminal chamber, respectively. **(e)** Time-  
899 lapse images of CTB carriers. Top panels: CTB labelling and tracing trajectories  
900 within the axon channels. Trajectories of small (#1, diameter  $\leq 0.5 \mu$ m) and large (#2,  
901 diameter  $> 0.5 \mu$ m) carriers are magnified in the bottom panels, respectively. **(f)**  
902 Representative kymographs of CTB-positive cargoes along a single axon, depicting  
903 track displacements of small and large carriers. x-bar = 10  $\mu$ m; y-bar = 10 s. **(g)**  
904 Grouped analysis of the average speeds of CTB cargoes with small (diameter  $\leq 0.5$   
905  $\mu$ m) and large (diameter  $> 0.5 \mu$ m) diameters. Data represent mean  $\pm$  s.e.m (small,  
906 n=187, large n=185 tracks from 3 independent preparations; two-tailed unpaired t-test,  
907 \*\*\* $p < 0.001$ ). **(h)** Pearson's coefficient of the speed and diameter of retrograde  
908 LysoTracker-positive and CTB-positive cargoes. Data represent mean  $\pm$  s.e.m from 3  
909 independent preparations (random, n=3 simulated data sets; LysoTracker, n=6 ; CTB,

910  $n=14$ ;  $n$  represents the number of axon channels analysed; the single value of the  
911 average correlation coefficient between the size and speed of all trajectories in each  
912 axon channel was calculated and used for the plot. 3 Independent groups of Gaussian-  
913 distributed random numbers were generated using the *normrnd* function of Matlab.  
914 Two-tailed unpaired t-test,  $**p<0.01$ ,  $*p<0.05$ ).

915

916 **Figure 2. The size of axonal cargoes correlates with the diameter of the axon.**

917 **(a)** Brightfield image of DIV14 rat hippocampal neurons cultured in a microfluidic  
918 device with the region selected for EM outlined. Scale bar = 250  $\mu\text{m}$ . **(b)**  
919 Representative electron micrographs showing the axonal diameter measurements with  
920 cargo (red) or without cargo (blue), and the associated cargo size (white). Scale bar =  
921 0.5  $\mu\text{m}$  **(c)** Electron micrographs of axon bundles from hippocampal neurons cultured  
922 in microfluidic devices. **(i-iv)** Axon diameters with and without cargo are marked  
923 with red and blue arrows, respectively. **(i)** Endosome = black arrow, **(i-iii)**  
924 Mitochondria = white arrowheads, autophagosome = black arrowheads. **(iv)** Inner  
925 diameters of cargoes are marked with white arrows. Bars = 500 nm. **(d)**  
926 Quantification of axon diameters with cargo and without cargo. Data represent mean  
927  $\pm$  s.e.m,  $n= 182$  (+ Cargo) and  $182$  (- Cargo) measurements from 2 independent  
928 preparations (two-tailed paired t-test,  $***p<0.001$ ). **(e)** Grouped quantification of  
929 axonal diameter as a function of binned vesicle size. Data represent mean  $\pm$  s.e.m; for  
930 the + Cargo group from left to right:  $n=104$ , 23, 41 and 14 measurements; for the -  
931 Cargo group from left to right:  $n=104$ , 23, 41 and 22 measurements, data were from 2  
932 independent preparations (two-tailed unpaired t-test,  $*p<0.05$ ;  $***p<0.001$ ). **(f)** Cross-  
933 correlation analysis of cargo size and axonal diameter. Linear regressions were



934 performed with the 182 paired measurements of axonal and cargo diameters of the (+  
935 Cargo) group, data from 2 independent preparations.

936

937 **Figure 3. Large retrograde cargoes produce “black-holes” within the axons of**  
938 **Lifect-GFP-expressing neurons.**

939 **(a)** Rat hippocampal neurons transfected with Lifect-GFP were pulse-labelled with  
940 CTB for 5 min and immediately subjected to 2D-SIM imaging; boxed regions of  
941 axonal segments are shown on the right. Relative localization of plasma membrane  
942 (CTB-labelled, arrowheads), F-actin (Lifect-GFP; asterisk) and cytosolic actin  
943 (Lifect-GFP; arrows). Bar = 10  $\mu\text{m}$  (right), 1  $\mu\text{m}$  (left). **(b)** Rat hippocampal neurons  
944 were transfected with Lifect-GFP and imaged with 3D-SIM. Top: a representative  
945 maximum projection of 3D-SIM of Lifect-GFP expressing axons are shown; Bar = 5  
946  $\mu\text{m}$ . Bottom: magnified regions of interest (ROIs) in top panel, arrowheads indicate  
947 black-holes with low Lifect-GFP signals within the axon. Bar = 1 $\mu\text{m}$ . **(c)**  
948 Quantification of axon diameters with (+) and without (-) black-holes. Data represent  
949 mean  $\pm$  s.e.m from 3 independent preparations (+ black-hole, n=29, - black-hole,  
950 n=29 axons; two-tailed unpaired *t*-test, \*\*\**p*<0.001). **(d-e)** Cultured hippocampal  
951 neurons grown in a microfluidic device were transfected on DIV12 with Lifect-GFP  
952 and co-transfected with either LC3-mRFP (autophagosome) **(d)**, Rab7-mRFP (late  
953 endosome) **(e)** or Mito-TagRFP (mitochondria) **(f)**, and subjected to time-lapse  
954 imaging on DIV 14. Representative dual-colour 3D-SIM projections of neurons  
955 expressing Lifect-GFP and with different subcellular markers are magnified in right  
956 panels, and overlapping regions are annotated. Bar = 5  $\mu\text{m}$ . **(g)** Quantification of axon  
957 diameters with (+) and without (-) annotated markers. Data represent mean  $\pm$  s.e.m  
958 (n=10 axons for each marker from 3 independent cultures; two-tailed unpaired *t*-test,

959 **\*\* $p < 0.01$ ; \*\*\* $p < 0.001$** ). **(h-i)** Representative dual-colour 3D-SIM projections of  
960 axons expressing Lifeact-GFP, which were co-labelled with the retrograde cargo  
961 marker CTB **(h)** or DIC<sup>1B</sup> **(i)**. Boxed regions are magnified in right panels,  
962 overlapping regions are annotated. Bar = 2  $\mu\text{m}$  **(h)** and 5  $\mu\text{m}$  **(i)**.

963

964 ***Figure 4. The transit of cargo causes a transient radial expansion of the axon.***

965 **(a)** Rat hippocampal neurons cultured in a glass-bottom dish were transfected with  
966 Lifeact-GFP (DIV 12) and imaged by time-lapse SIM (DIV 14). Representative live  
967 axons with cargo-associated black-holes passing through are shown, with inset  
968 demonstrating the Gaussian fittings of the annotated line transection of axon. Bar =  
969 0.5  $\mu\text{m}$  (inset). **(b)** Time-lapse images of bracketed region in A, showing the axonal  
970 diameter fluctuation as the cargo (indicated with red bar) transits. **(c)** Plot of the  
971 distance between axon membranes against time. **(d-e)** Live-confocal imaging of axons  
972 carrying CTB-positive **(c)** or LysoTracker-positive **(d)** cargoes. Magnified images of  
973 the boxed region are shown in the lower panels, and moving cargoes are indicated  
974 with arrowheads. Bar = 10  $\mu\text{m}$ .

975

976 ***Figure 5. Short-term inactivation of NM-II increases the axon diameter without***  
977 ***affecting the actin ring periodicity.***

978 **(a)** SIM images of a Lifeact-GFP-expressing axon from a DIV14 rat hippocampal  
979 neuron, before and after short-term blebbistatin treatment (10  $\mu\text{M}$ , 60 min). Boxed  
980 regions are magnified in right panels. Axon diameter with and without cargoes is  
981 indicated by arrowheads and arrows respectively. Bar = 0.4  $\mu\text{m}$ . **(b)** Axon diameter  
982 quantification. Data represent mean  $\pm$  s.e.m, n=29, 29, 37, 37 axons from left to right.  
983 Values were measured from 3 independent cultures (two-tailed unpaired t-test,

984 \*\*\* $p < 0.001$ ) (c) Analysis of axon diameter fluctuation. Data represent mean  $\pm$  s.e.m,  
985  $n = 29$  (pre), 22 (+BLB) axons from left to right. Values were measured from 3  
986 independent cultures (two-tailed unpaired t-test, \*\*\* $p < 0.001$ ). (d) SIM images of  
987 endogenous F-actin (phalloidin) along the axon of a DIV14 rat hippocampal neuron  
988 before and after short-term blebbistatin treatment (10  $\mu$ M, 60 min). Bracketed regions  
989 are magnified on the right, and the diameters of actin rings are shown below. (e, f)  
990 Comparison of periodic actin spacing distribution (e) and average value (f) in control  
991 and blebbistatin-treated neurons. Data represent mean  $\pm$  s.e.m,  $n = 300$  (Control), 316  
992 (+BLB) for periodicity quantification. (g) Autocorrelation analysis of the actin  
993 periodicity of control and blebbistatin-treated axons. Data represent mean  $\pm$  s.e.m,  $n =$   
994 10 (Control) and 8 (+BLB) axon segments were measured. (h) Distribution of actin  
995 diameters in control and blebbistatin-treated axons. Data represent mean  $\pm$  s.e.m,  $n =$   
996 42 (Control) and 46 (+BLB) actin rings diameters were measured. (i) Quantification  
997 of actin ring diameter fluctuations; the diameters per 10  $\mu$ m axon segments were  
998 measured and quantified. Data represent mean  $\pm$  s.e.m,  $n = 11$  (Control) and 11 (+BLB)  
999 axon segments were analysed. Values were measured from 3 independent cultures  
1000 (two-tailed unpaired t-test, n.s. no significant difference; \*\* $p < 0.05$ ; \*\*\* $p < 0.001$ ).

1001

1002 ***Figure 6. NM-II immunostaining reveals a periodic pattern that correlates with the***  
1003 ***periodic actin rings along the axons.***

1004 (a) Dual-colour SIM images of endogenous F-actin (phalloidin) and NM-IIB in  
1005 control and blebbistatin-treated axons of DIV14 rat hippocampal neurons. Boxed  
1006 regions are magnified in right panels. Bar = 1  $\mu$ m (left) and 0.5  $\mu$ m (right). Discrete  
1007 distributions of NM-II and actin are marked with arrows in bottom panels. (b) A line  
1008 profile was used to characterize the periodic actin ring and NM-II structures.

1009 Overlapping and alternating peaks are marked with arrows and arrowheads  
1010 respectively. **(c-e)** Comparison of NM-II distribution in control and short-term (60  
1011 min) blebbistatin-treated axons. Due to the staining efficiency of the NM-II antibody,  
1012 only the spacing between at least 4 consecutive NM-II puncta were analysed. The  
1013 Gaussian distribution **(c)** autocorrelation **(d)** and scattered plot **(e)** of NM-II spacing  
1014 are shown. Data represent mean  $\pm$  s.e.m, n = 8 (pre) and 9 (+BLB) axon segments  
1015 were analysed for autocorrelation; n = 262 (Control), 261 (+BLB) NM-II puncta were  
1016 analysed for periodic distribution. Data are from 3 independent cultures (two-tailed  
1017 unpaired t-test, n.s. no significant difference). **(f)** Comparison of NM-II and actin ring  
1018 cross-correlation in control and short-term (60 min) blebbistatin-treated axons;  
1019 significant reduction of cross-correlation after blebbistatin treatment is annotated at 0  
1020 nm shifts. Data represent mean  $\pm$  s.e.m; n = 5 (Control), 6 (+BLB) axon segments  
1021 were analysed. Values were from 3 independent cultures (two-tailed unpaired t-test,  
1022 \*\*\* $p < 0.001$ ).

1023

1024 **Figure 7. Short-term inactivation of actomyosin-II reduces the efficiency of**  
1025 **retrograde axonal trafficking.**

1026 **(a)** DIV 14 rat hippocampal neurons were cultured in microfluidic devices, and the  
1027 axon segments were subjected to short-term blebbistatin treatment (10  $\mu$ M, 60 min).  
1028 Trajectories of CTB-positive cargoes in the axon channels were traced before (pre)  
1029 and after (+BLB) blebbistatin treatment. Bar = 10  $\mu$ m. **(b, c)** Track speed (trajectory  
1030 length/duration) of the CTB carriers **(b)** or LysoTracker carriers **(c)** before (pre) and  
1031 after (+BLB) blebbistatin treatment. The speeds of these carriers were sub-grouped  
1032 according to their diameters. Data represent mean  $\pm$  s.e.m, n=187, 185, 271, 286  
1033 (CTB) and n=179, 342, 128, 573 (LysoTracker) trajectories from 3 independent

1034 cultures (two-tailed unpaired t-test,  $*p<0.05$ ,  $***p<0.001$ , n.s. no significant  
1035 difference). The same data of pre-treated groups were used in Figure 1G and Figure  
1036 S1B. **(d)** Displacement-time plot of representative CTB trajectories. (i) Fast moving  
1037 state, and (ii) stalled state, as magnified on the right, with the back-and-forth  
1038 movements marked with asterisks.  $\bar{x} = 10 \mu\text{m}$ ,  $\bar{y} = 20 \text{ s}$ . **(e)** Time ratio of cargo  
1039 travelling in the reverse direction (swap) to total time travelled. Data represent mean  $\pm$   
1040 s.e.m,  $n=28$  (Pre) and 34 (+BLB) channels from 3 independent preparations (two-  
1041 tailed unpaired t-test,  $***p<0.001$ ). **(f)** Quantification of the frequency of CTB-  
1042 labelled vesicles that cross the observation window per minute. Data represent mean  $\pm$   
1043 s.e.m,  $n = 51$  (Pre) and 32 (+BLB 60') channels from 3 independent preparations  
1044 (two-tailed unpaired t-test,  $*p<0.05$ ). **(g)** CTB trajectory displays stalled (D, blue) and  
1045 fast-moving (DV, pink) motion states inferred by HMM-Bayes analysis. Example of  
1046 an annotated trajectory colour-coded with the indicated motion states. The time line  
1047 shows the temporal (s) sequence of the inferred D and DV motion states. **(h)** Step  
1048 sizes of the two motion states before (pre) and after (+BLB) blebbistatin treatment.  
1049 Data represent mean  $\pm$  s.e.m, from left to right,  $n= 126, 126, 190, 190$  different  
1050 trajectories from 3 independent preparations (two-tailed unpaired t-test,  $***p<0.001$ ).

1051

1052 **Figure 8. Long-term inhibition of actomyosin-II activity triggers accumulation of**  
1053 **stalled cargo in focal axonal swellings (FAS).**

1054 **(a)** Hippocampal neurons (DIV 14) expressing Lifeact-GFP were incubated with  
1055 blebbistatin (10  $\mu\text{M}$ ) for the indicated durations. Time-lapse SIM images showing  
1056 morphological changes. The bracketed regions are magnified. Bar = 2  $\mu\text{m}$  (left); 1  $\mu\text{m}$   
1057 (right). **(b)** Percentage of axons with FAS following short-term (60 min) and long-  
1058 term (120 min) blebbistatin treatment. Data represent mean  $\pm$  s.e.m,  $n=10$  (Pre), 9

1059 (+BLB, 60 min) and 10 (+BLB, 120 min) independent ROIs were analysed. **(c-e)**  
1060 Representative channel overlapping with CTB trajectories is shown in **(c)**.  
1061 Quantification of the track speed **(d)** and transverse frequency **(e)** of CTB carriers  
1062 following long-term (120 min) blebbistatin treatment. Bar = 10  $\mu$ m. Data represent  
1063 mean  $\pm$  s.e.m; for track speed analysis, n=185 (Pre), 286 (60 min) and 215 (120 min)  
1064 trajectories, the same data sets of large cargo speed in pre-treated groups were used in  
1065 Fig. 1g and Fig. 7b; for frequency analysis, n=51 (pre), 32 (60 min) and 13 (120 min)  
1066 independent channel ROIs were analysed. **(f)** DIV 14 hippocampal neurons  
1067 expressing Lifeact-GFP and LC3-mRFP were incubated with blebbistatin (10  $\mu$ M,  
1068 120 min), with the accumulated autophagosome cargoes marked by asterisks.  
1069 Kymograph of an axon is shown in the bottom panel. x-bar = 10  $\mu$ m, y-bar = 60 s. **(g)**  
1070 Quantification of the average speed of LC3 cargoes, and the number of FAS  
1071 accompanied with LC3 cargo accumulation **(h)**, following long-term blebbistatin  
1072 treatment. Data represent mean  $\pm$  s.e.m; for LC3 speed, n= 72 (Pre), n=68 (120 min)  
1073 trajectories; for the FAS percentage, n=10 (Pre), 9 (120 min) independent ROIs. All  
1074 data were from 3 independent cultures (two-tailed unpaired t-test, \* $p$ <0.05;  
1075 \*\*\* $p$ <0.001). **(i)** Rat hippocampal neurons were co-transfected on DIV12 with the  
1076 Lifeact-mRFP and either myosin-II regulatory light chain wild-type or S19AT18A  
1077 mutant (MRLC<sup>mut</sup>-GFP) plasmids. On DIV14 the diameter fluctuations **(j)** and FAS  
1078 numbers per  $\mu$ m **(k)** of transfected axons were quantified. Data represent mean  $\pm$   
1079 s.e.m; for actin ring fluctuation **(j)**, n= 25 (wt), n=45 (mut) independent axonal  
1080 segments are measured; for the FAS counts **(k)**, n=9 (wt), 26 (mut) independent axons  
1081 are counted. Data were from 2 independent preparations (two-tailed unpaired t-test,  
1082 \*\*\* $p$ <0.001).

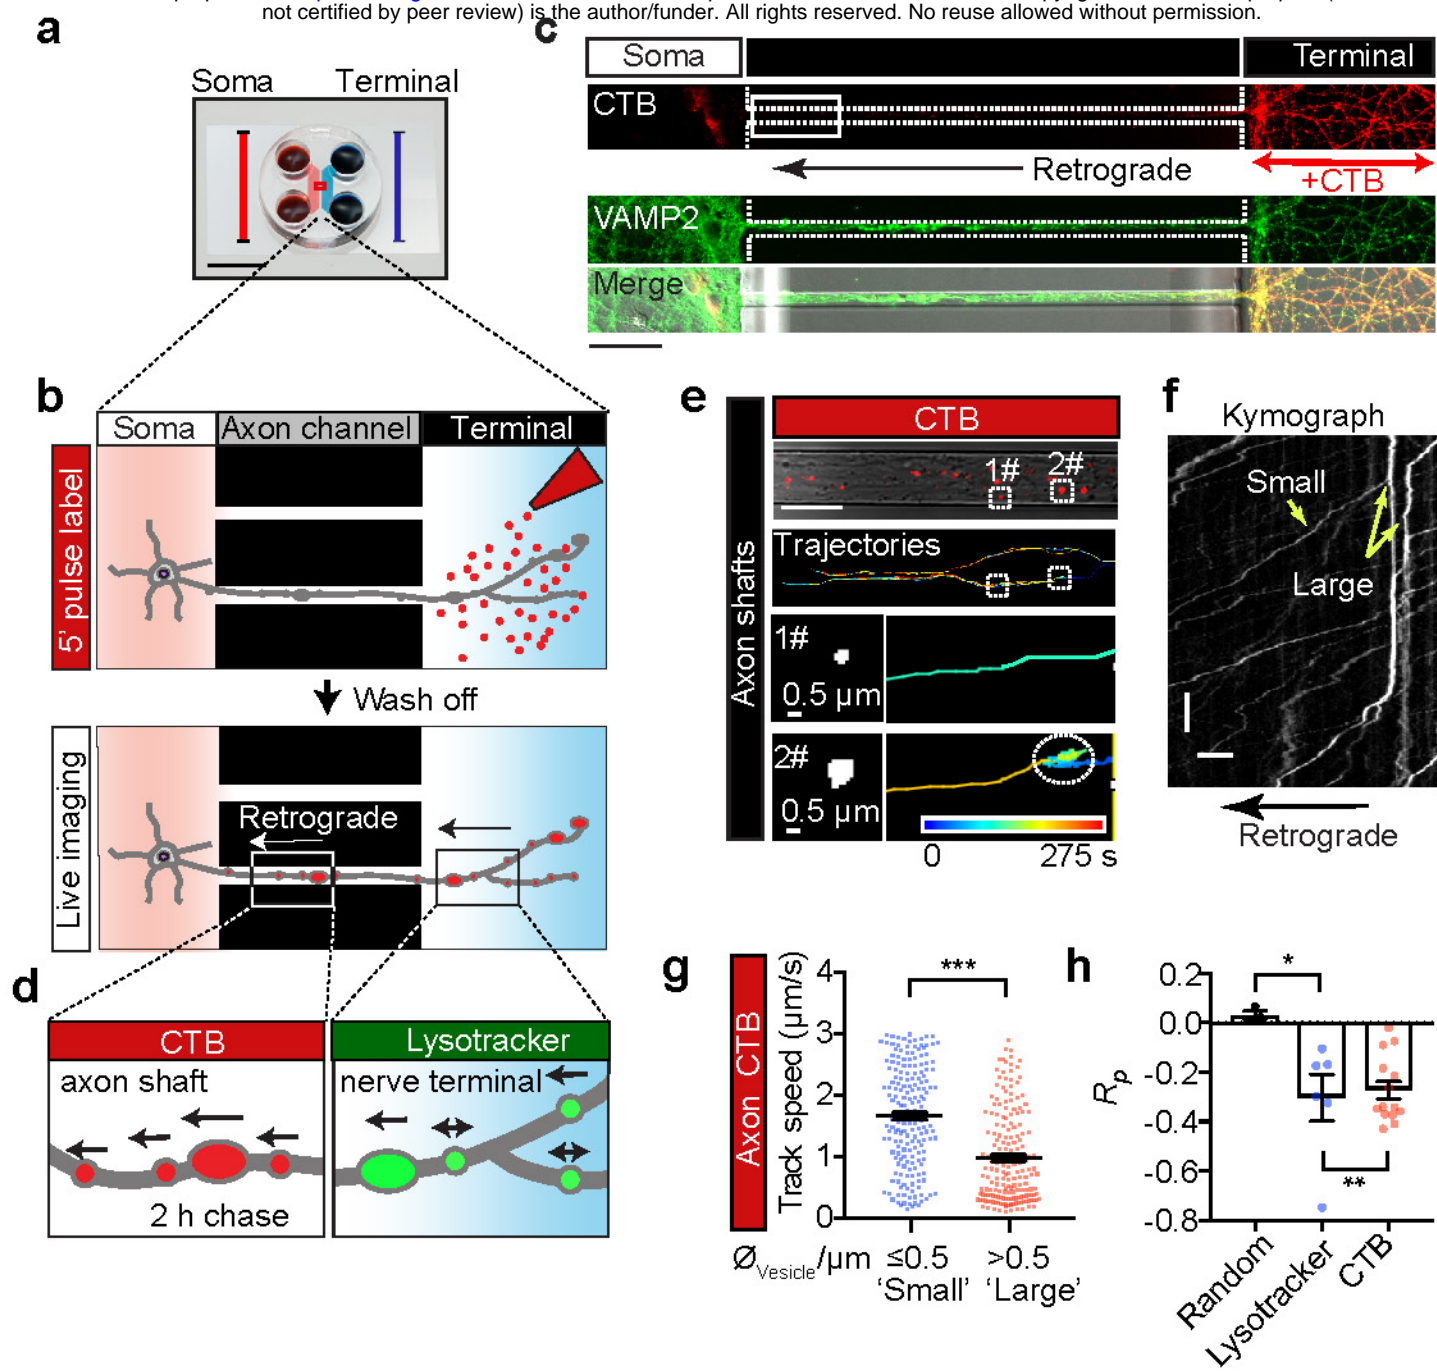

Figure 1. The speed of retrograde axonal transport cargoes is inversely correlated with their size.

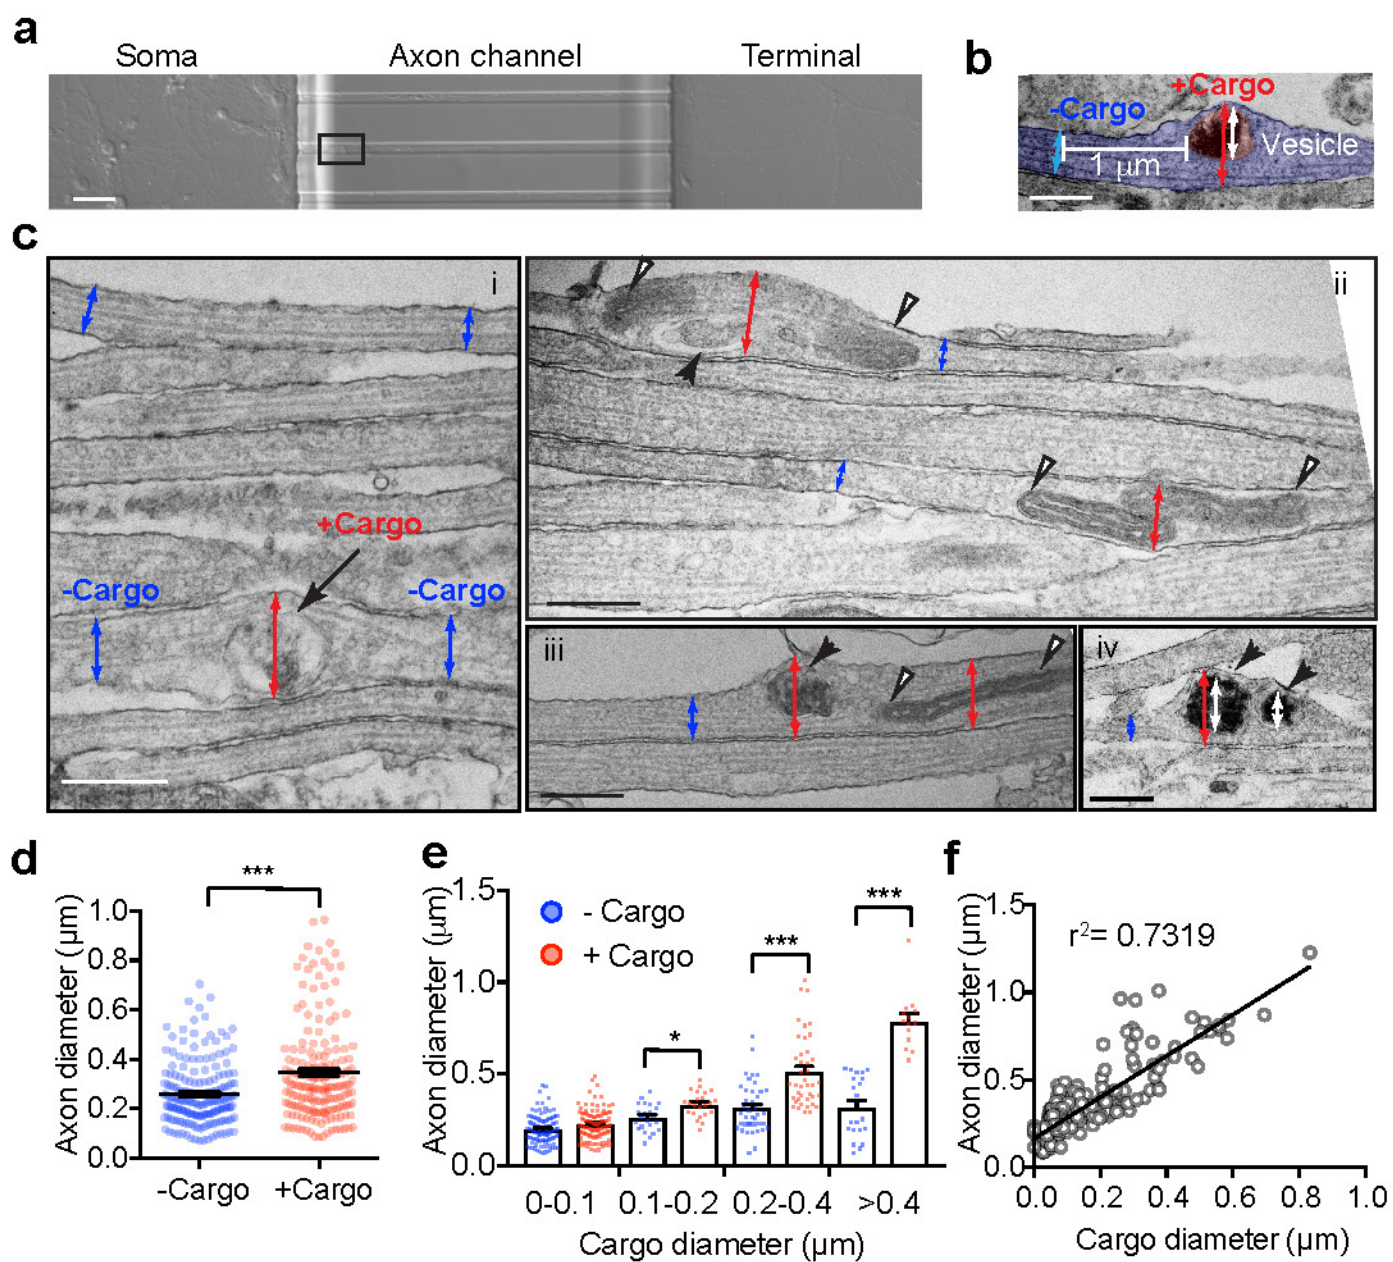

Figure 2. The size of axonal cargoes correlates with the transient radial expansion of axon shafts.



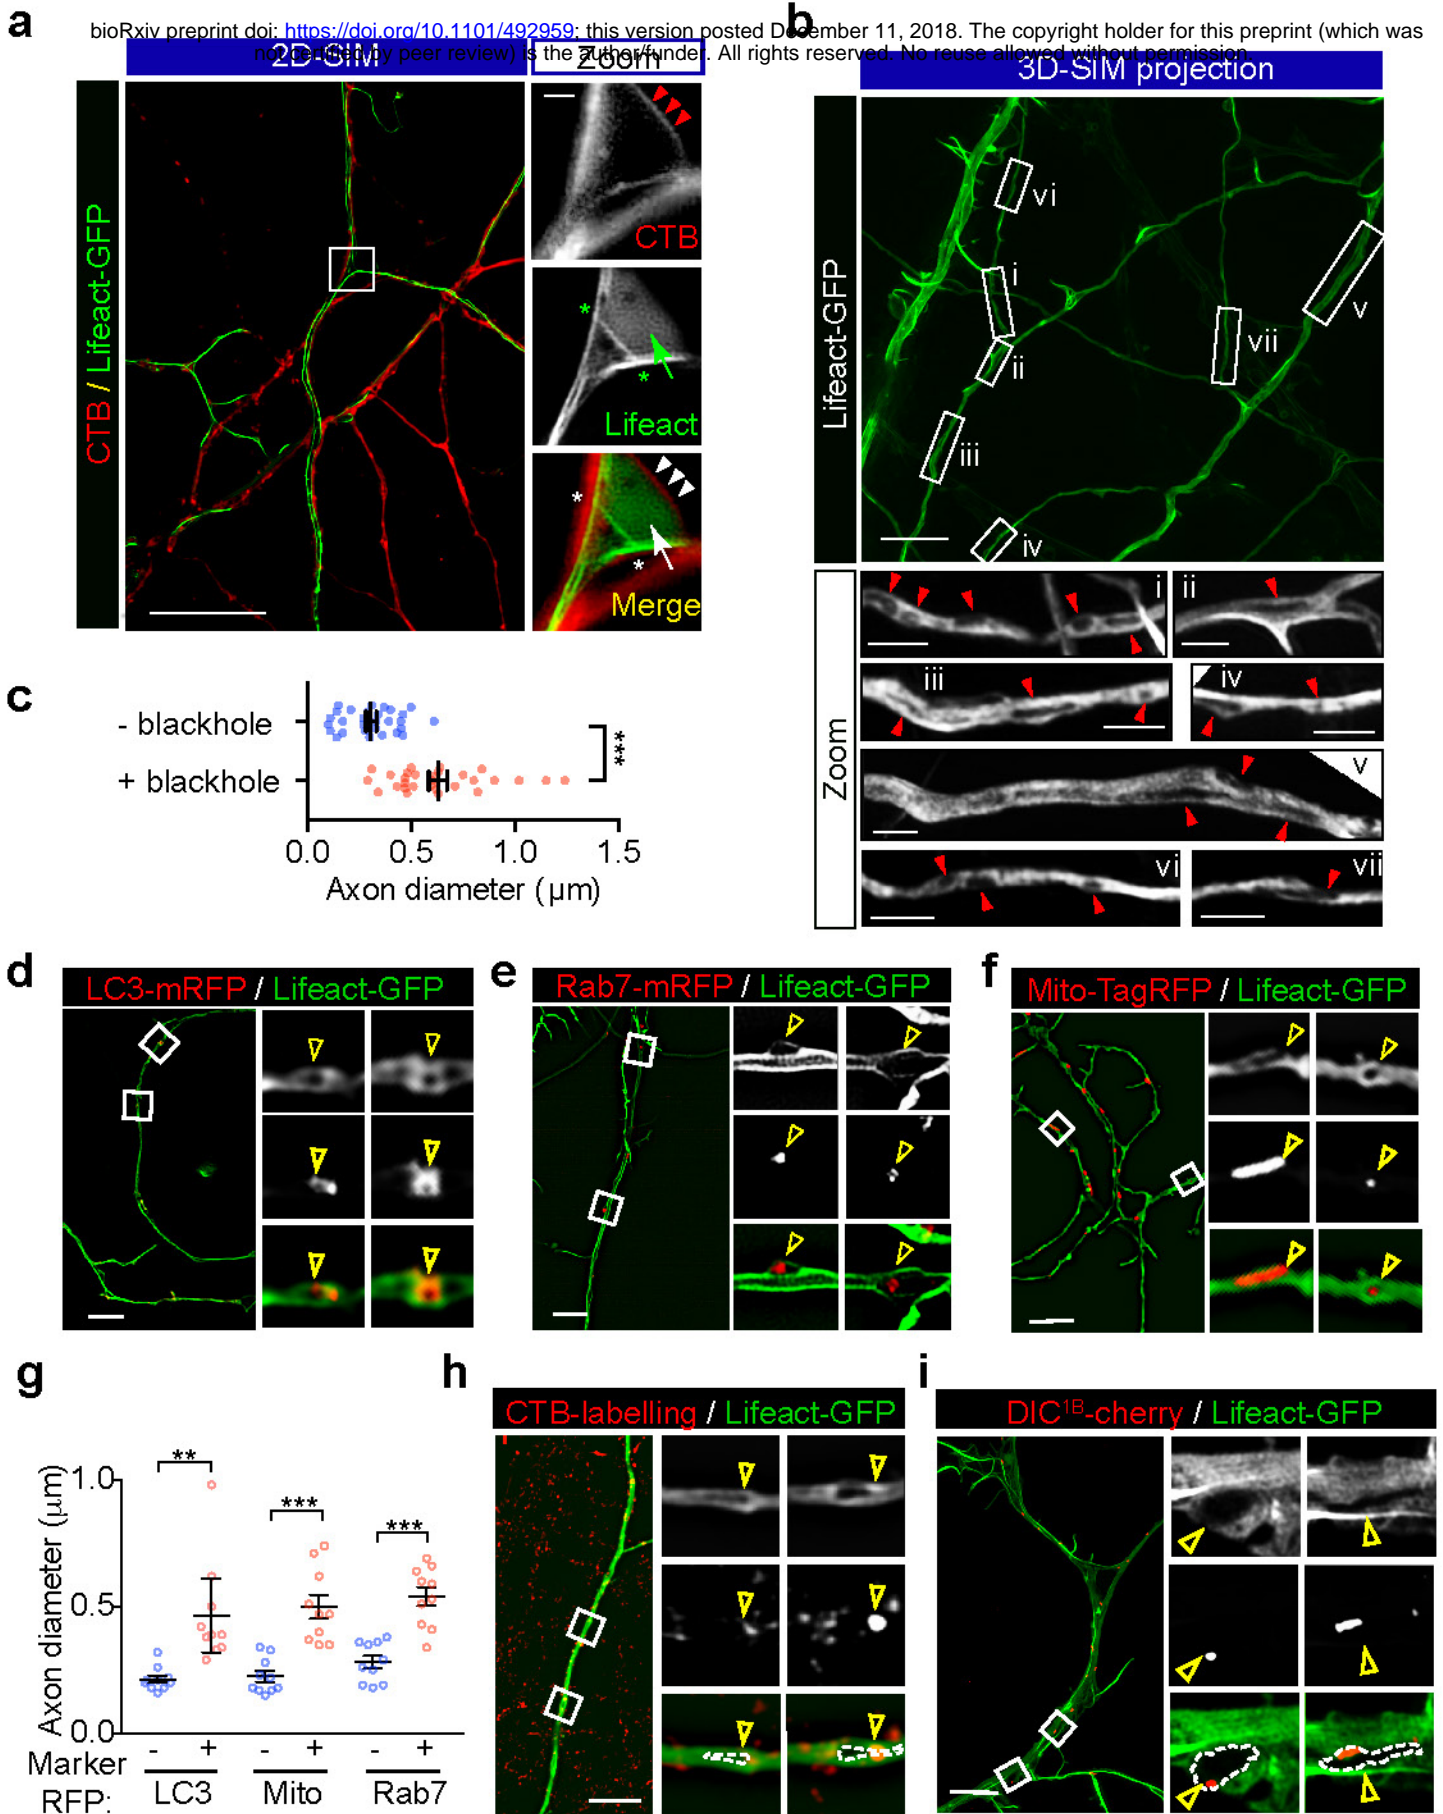

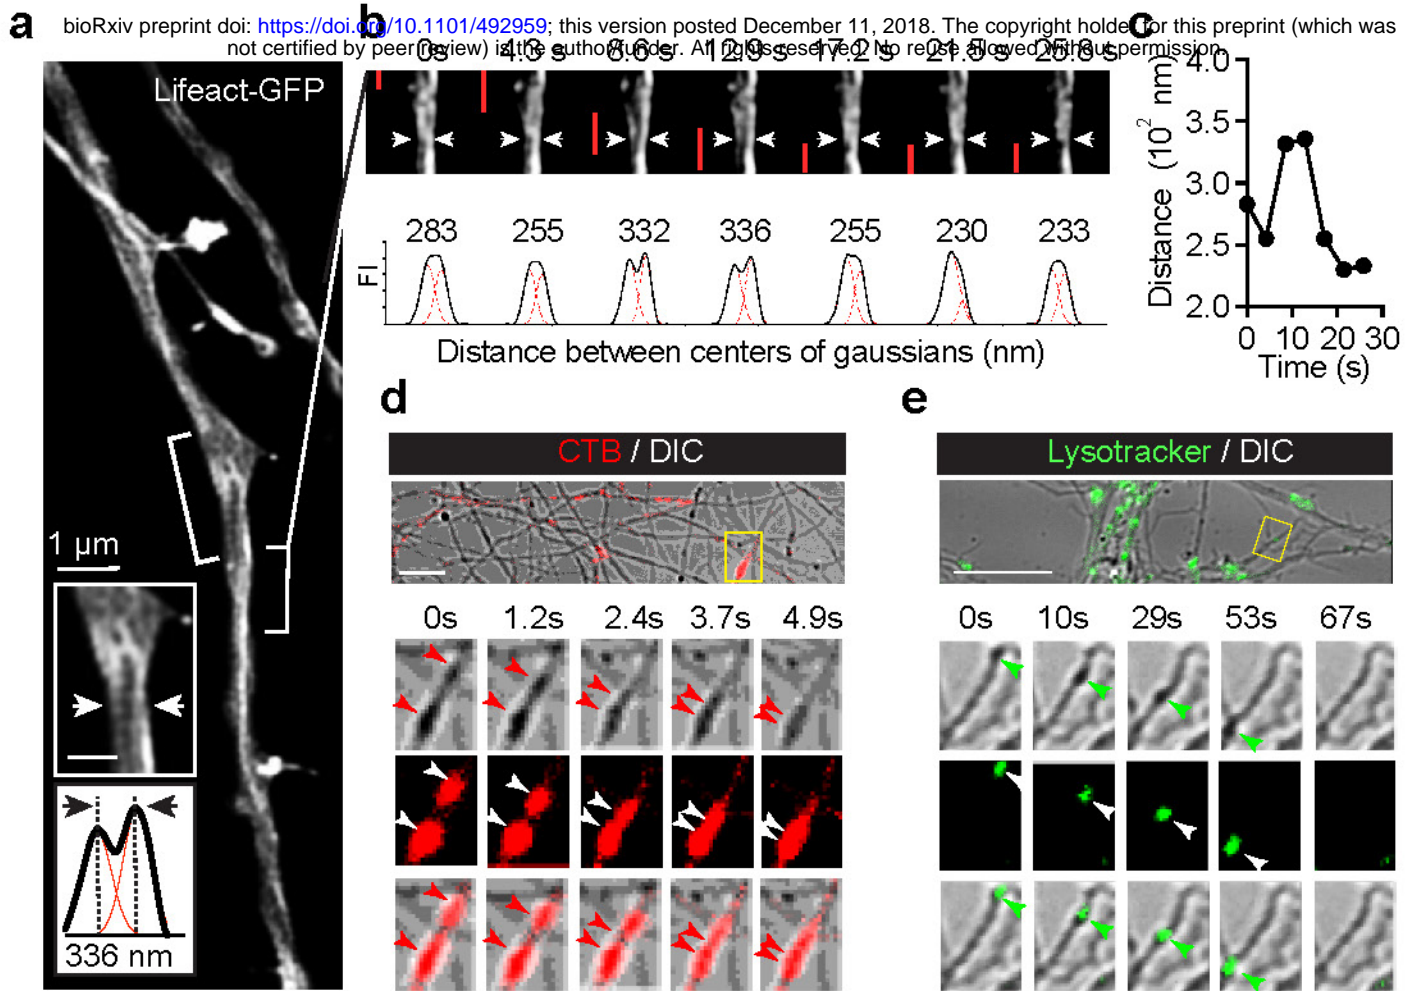

Figure 4. The transit of cargo causes a transient radial expansion of the axon.

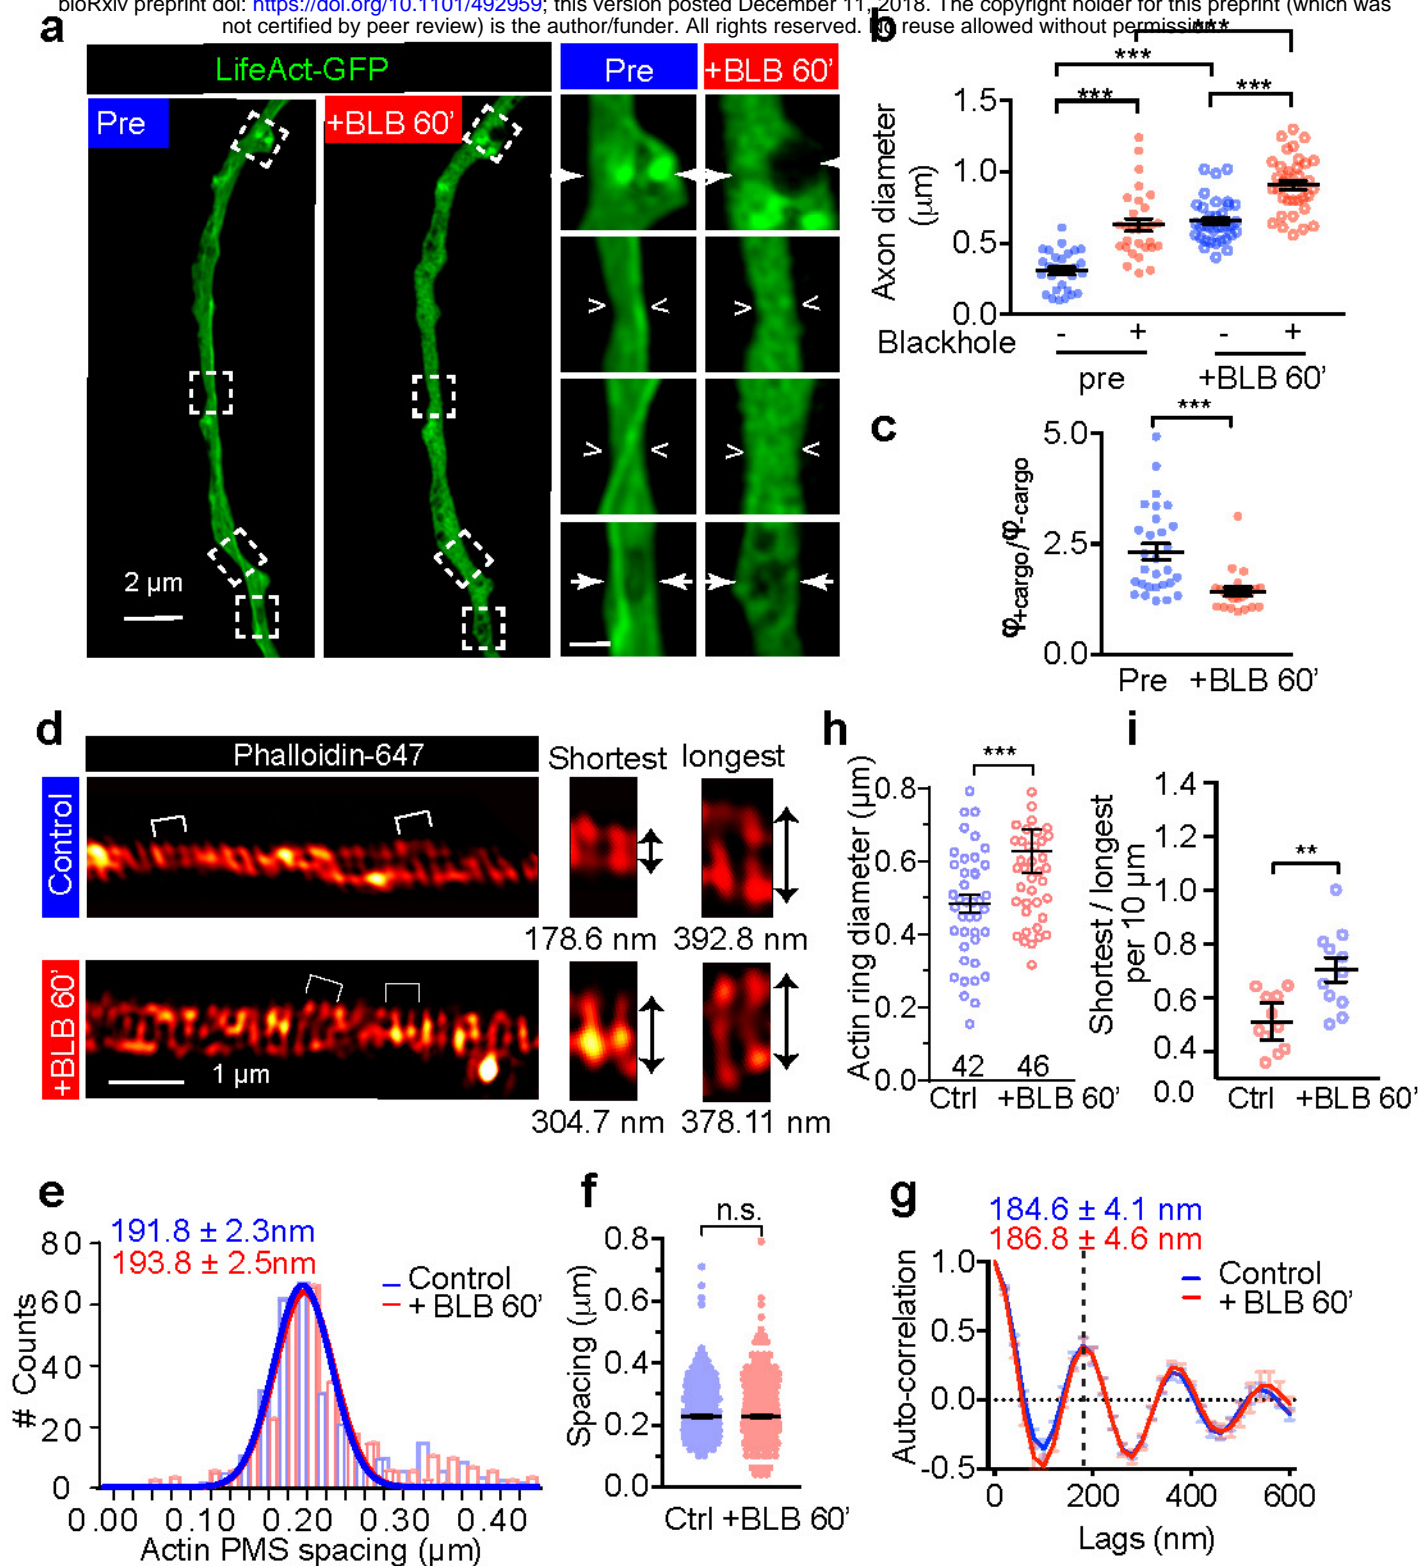

**Figure 5 Short-term inactivation of NM-II increases the axon diameter without affecting the actin ring periodicity.**

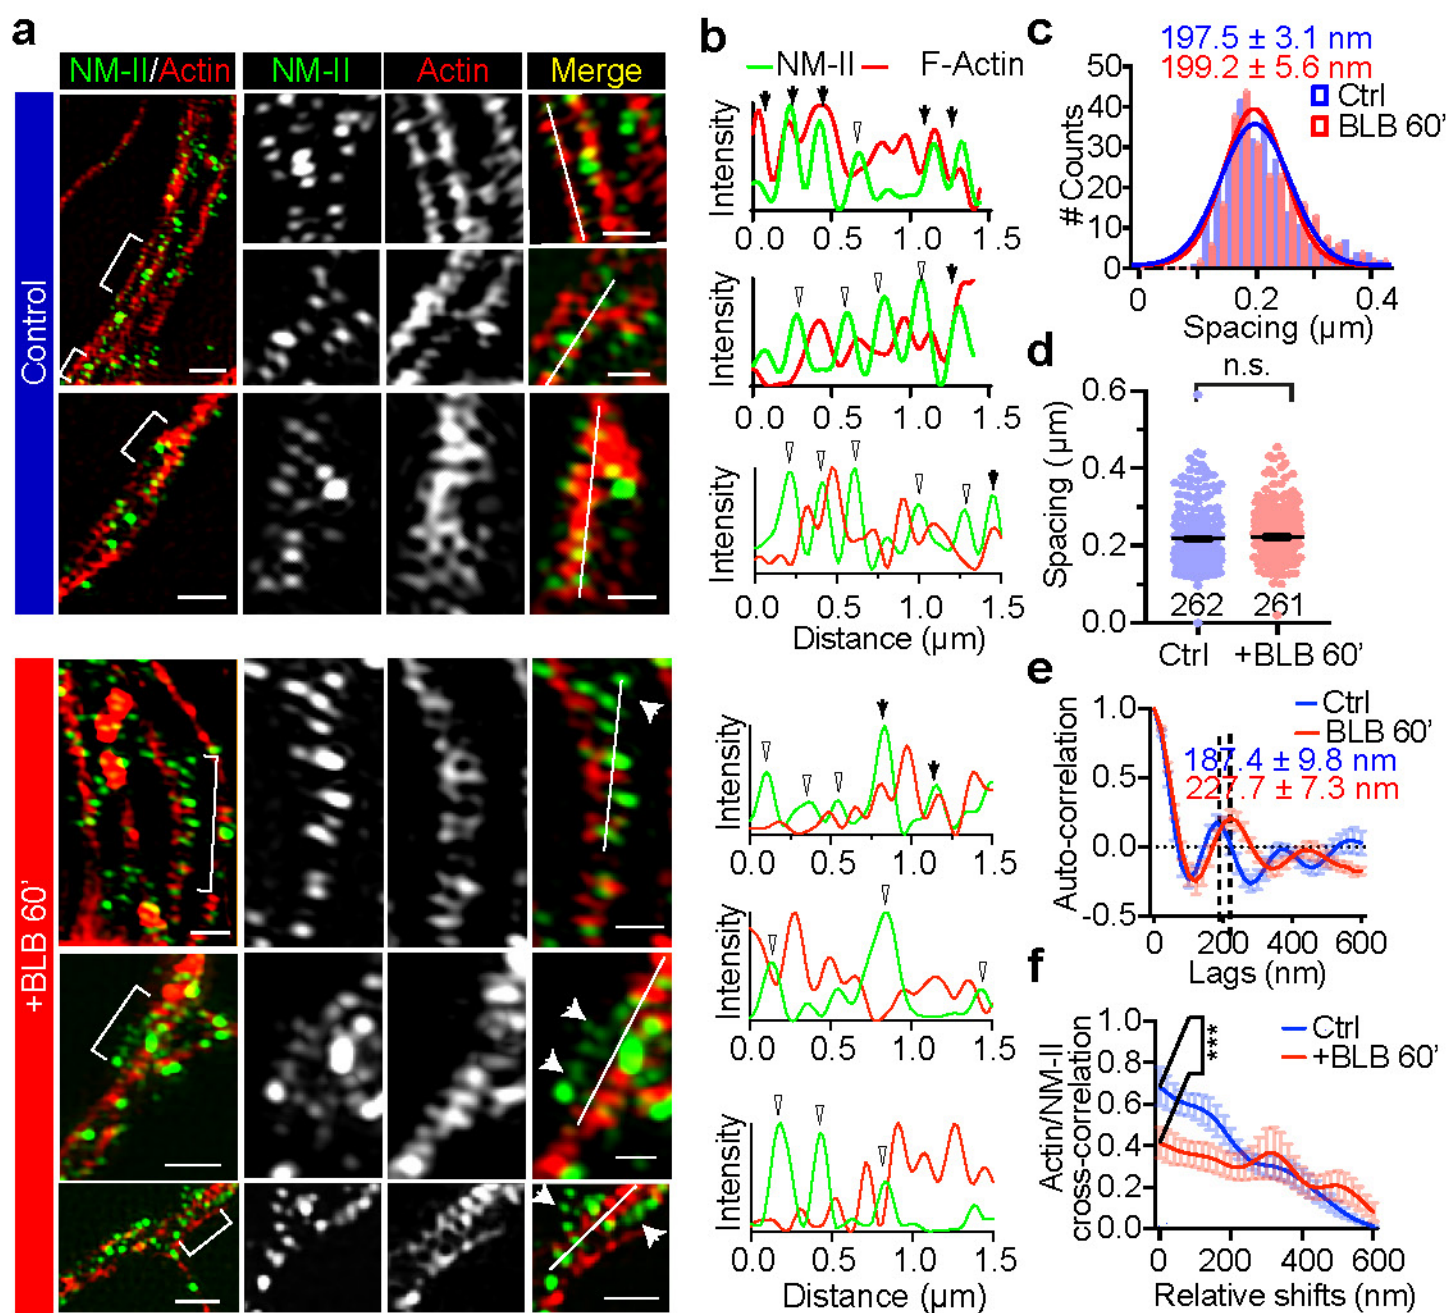

**Figure 6. NM-II immunostaining reveals a periodic pattern that correlates with the periodic actin rings along the axons.**

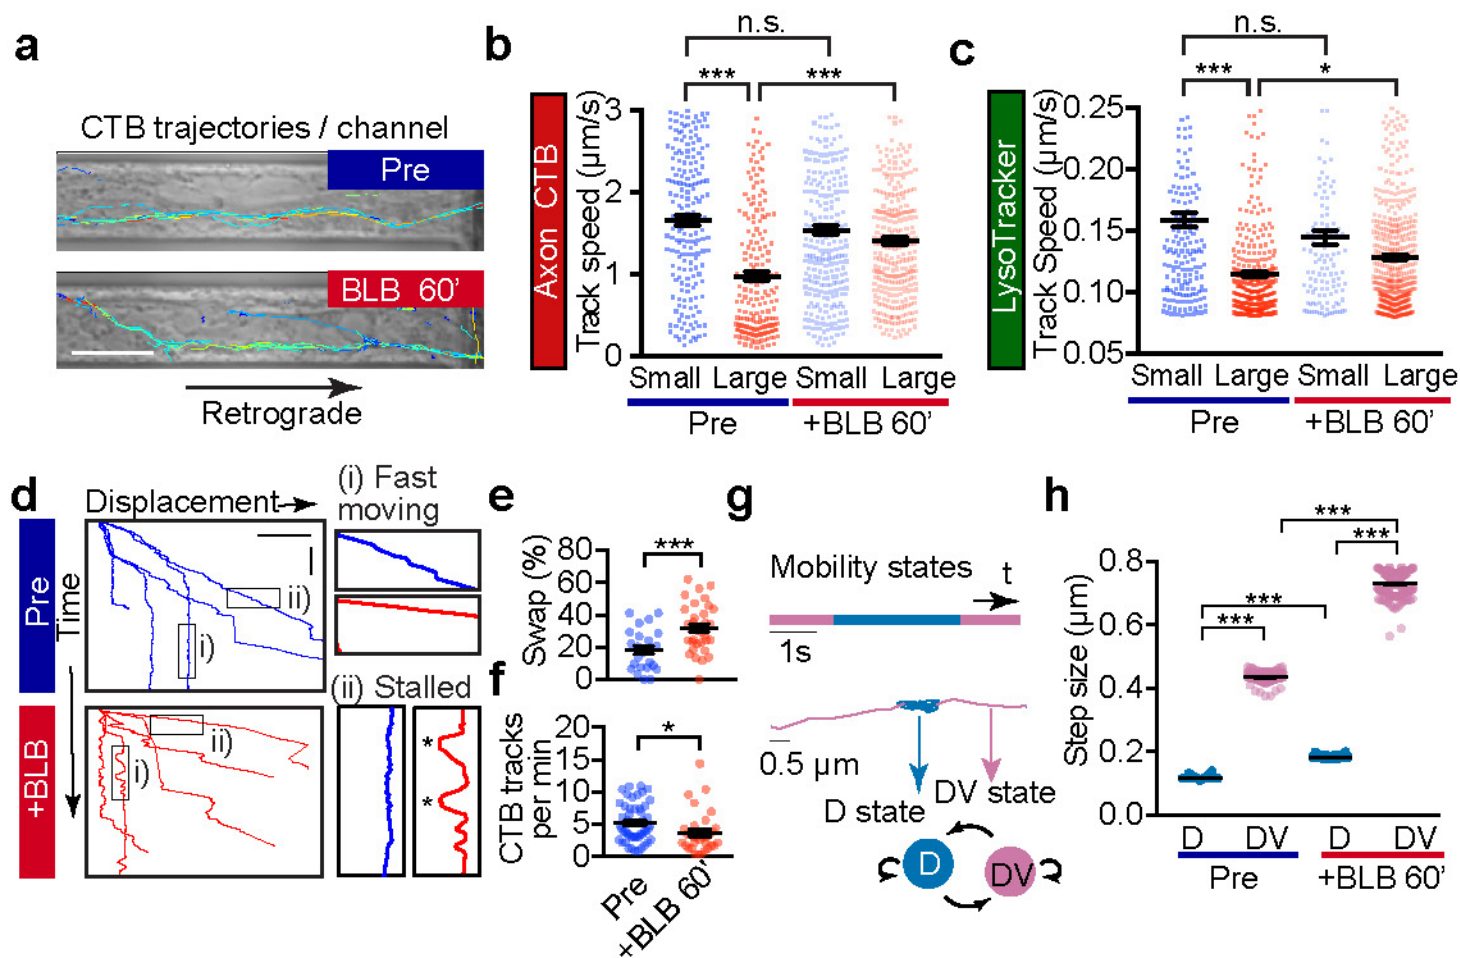

Figure 7. Short-term inactivation of actomyosin-II reduces the retrograde transport efficiency.

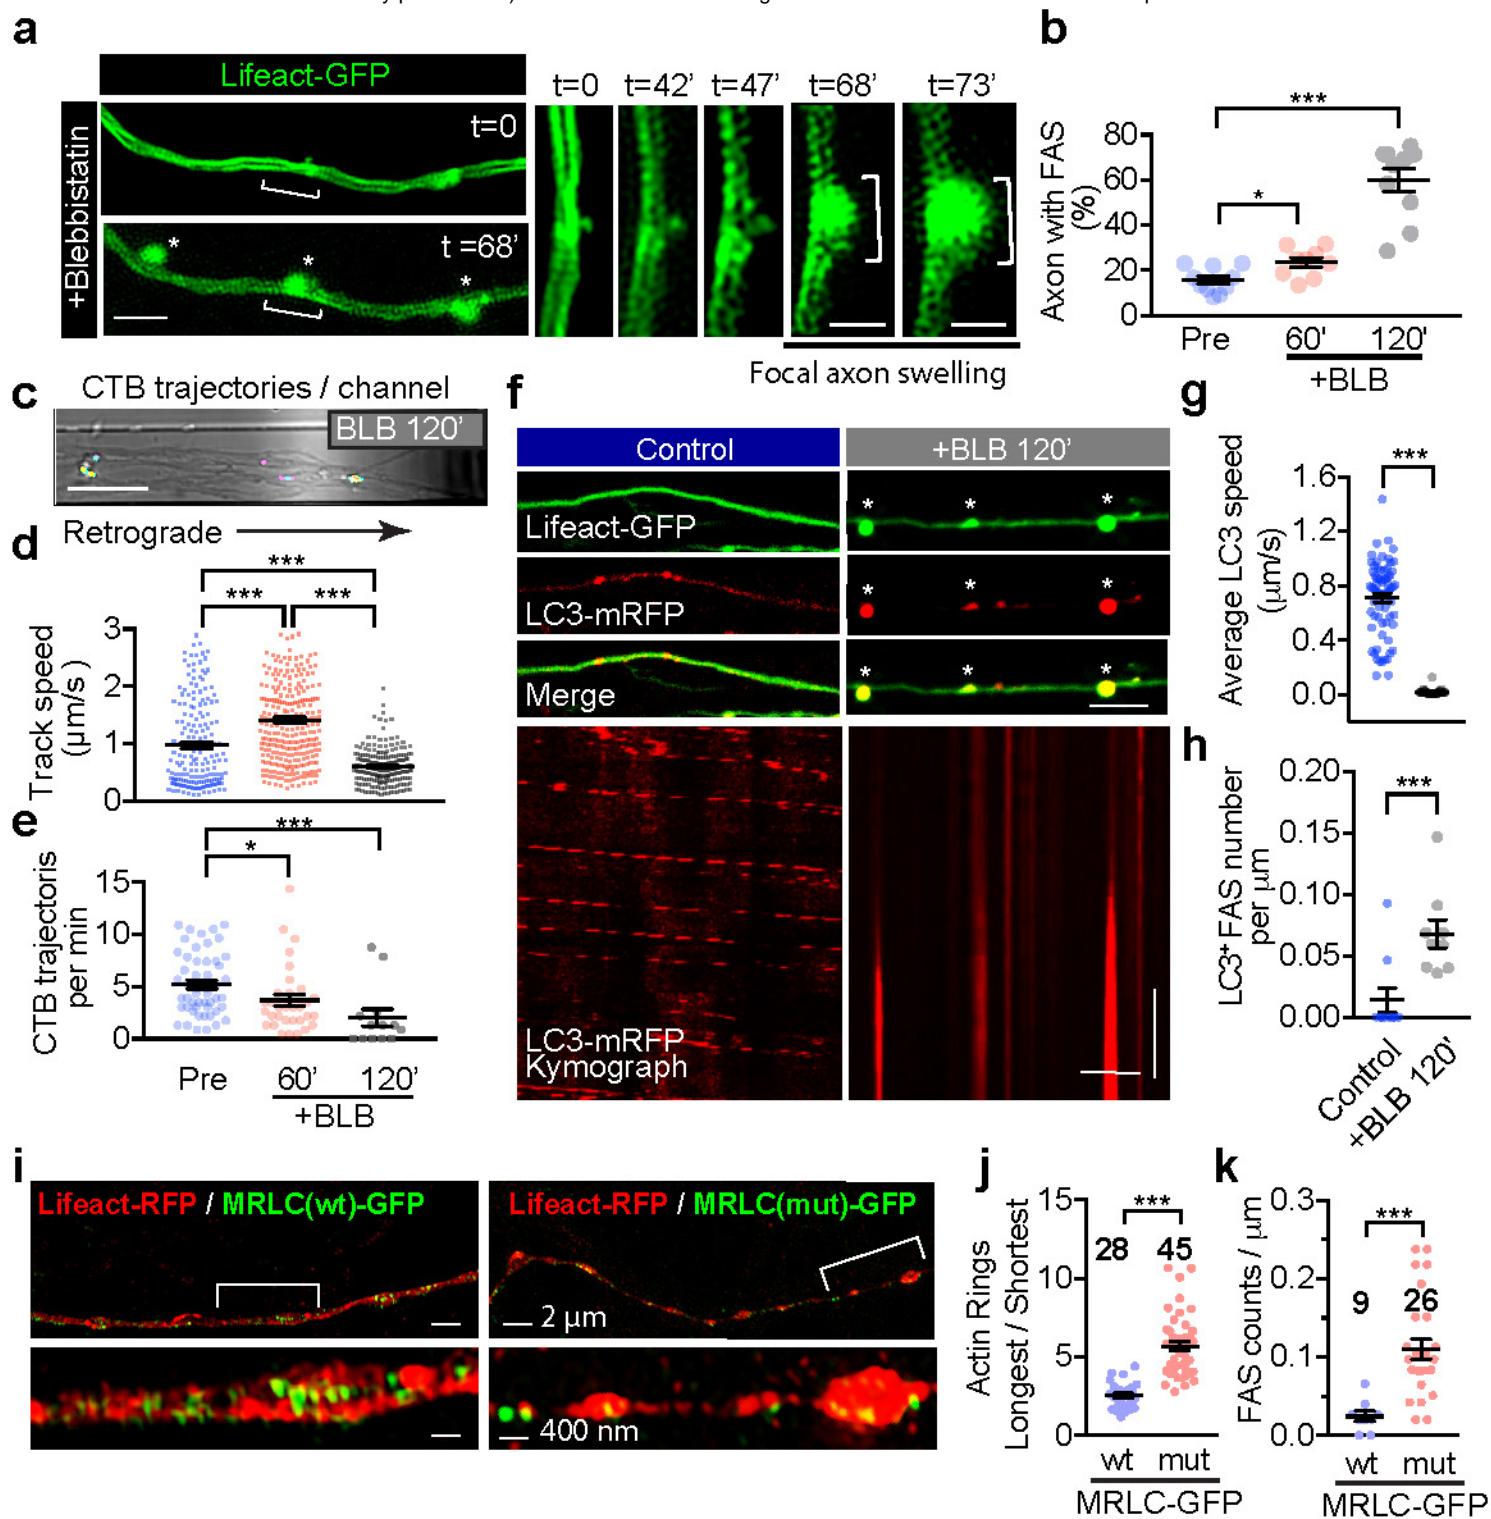

**Figure 8. Long-term inhibition of actomyosin-II activity triggers accumulation of stalled cargo in focal axonal swellings (FAS).**
